# Supplementary material for: Characteristics of ozone and particles in the near-surface atmosphere in urban area of the Yangtze River Delta, China
Source: Copernicus journal article supplement (doi:10.5194/acp-2018-927), 2018-10-15
Supplement: Supplementary file [file acp-2018-927-AC1-supplement.pdf]

1 **Characteristics of ozone and particles in the near-surface atmosphere in urban area of the**  
2 **Yangtze River Delta, China**

3 Huimin Chen<sup>1</sup>, Bingliang Zhuang<sup>1,\*</sup>, Jane Liu<sup>1,2</sup>, Tijian Wang<sup>1,\*\*</sup>, Shu Li<sup>1</sup>, Min Xie<sup>1</sup>, Mengmeng Li<sup>1</sup>,  
4 Pulong Chen<sup>1</sup>, Ming Zhao<sup>1</sup>

5 <sup>1</sup>School of Atmospheric Sciences, CMA-NJU Joint Laboratory for Climate Prediction Studies,  
6 Jiangsu Collaborative Innovation Center for Climate Change, Nanjing University, Nanjing  
7 210023, China

8 <sup>2</sup>Department of Geography and Planning, University of Toronto, Toronto, M5S 3G3, Canada

9 Correspondence: Bingliang Zhuang ([blzhuang@nju.edu.cn](mailto:blzhuang@nju.edu.cn)) and Tijian Wang ([tjwang@nju.edu.cn](mailto:tjwang@nju.edu.cn))

10 **Abstract**

11 Aerosols and ozone have significant influences on air qualities, human health and climate changes.  
12 To further understand the characteristics and interactions among different urban air pollutants in the  
13 west Yangtze River Delta (YRD) region, continuous measurements of low layer atmospheric  
14 particles and trace gases have been performed at an urban site in Nanjing from September 2016 to  
15 February 2017 in this study. In urban area of west YRD, the mean PM<sub>10</sub> and O<sub>3</sub> concentrations are  
16 86.3 μg/m<sup>3</sup> and 37.7 ppb, respectively, with significant seasonal and diurnal variations. Particles,  
17 which are dominated by fine aerosols, are relatively scattering. And most of their optical properties  
18 have the similar variations to the aerosol concentrations. Results also show that west YRD could  
19 still suffer severe air pollutions, although the seasonal mean aerosol concentrations have been  
20 decreased in recent years. Even in cold seasons, O<sub>3</sub> could have about 40 days excess against to the  
21 National Ambient Air Quality Standards during the sampling period. Most of polluted episodes are

22 caused by local and sub-regional emissions. A case study for a typical O<sub>3</sub> and PM<sub>2.5</sub> episode in  
23 December 2016 demonstrates that the episode was generally associated with regional transport and  
24 stable weather system. Air pollutants were mostly transported from the western areas with high  
25 emissions, as well as with an anticyclone and high-pressure system in this region. Correlation  
26 analysis reveals that the interaction between O<sub>3</sub> and PMs are complex with a combination of  
27 inhibition and promotion under different conditions. The inhibition effect might result from the  
28 reduction of photolysis frequency near surface due to aerosols besides their positive correlations  
29 with precursors, while the promotion effect is from the formation of secondary aerosols under high  
30 concentrations of oxidants and solar radiation. However, the interaction between O<sub>3</sub> and BC shows  
31 an inhibit effect due to its chemical stability. It is also indicated a VOC-sensitive regime for  
32 photochemical production of O<sub>3</sub> in this region. This study further improves the insight in the  
33 characteristics and interactions of main pollutants, and might have a certain contribution to improve  
34 the simulation and prediction of aerosols and gases in urban area of YRD.

35 ~~To improve the understanding of the interactions between particles and trace gases in a typical city~~  
36 ~~of the YRD region, continuous measurements of particles and trace gases were made at an urban~~  
37 ~~site in Nanjing during cold seasons in 2016 in this study. The average of particles, including black~~  
38 ~~carbon (BC), PM<sub>2.5</sub>, and PM<sub>10</sub> are  $2.602 \pm 1.720 \mu\text{g}/\text{m}^3$ ,  $58.2 \pm 36.8 \mu\text{g}/\text{m}^3$ , and  $86.3 \pm 50.8 \mu\text{g}/\text{m}^3$ ,~~  
39 ~~respectively, while the average of trace gases, which contain CO, O<sub>3</sub>, NO<sub>x</sub>, and NO<sub>y</sub>, are  $850.9 \pm$~~   
40  ~~$384.1$ ,  $37.7 \pm 33.5$ ,  $23.5 \pm 14.7$ , and  $32.8 \pm 22.3$  ppb, respectively. Compared to National Ambient~~  
41 ~~Air Quality Standards in China (NAAQS-CN), we found 48 days excess of PM<sub>2.5</sub>, 14 days excess~~  
42 ~~of PM<sub>10</sub>, and 40 days excess of O<sub>3</sub>. The particles, CO, and nitrogen oxide concentrations shared a~~  
43 ~~similar pattern of seasonality and diurnal cycles, which are different from O<sub>3</sub>. The former ones are~~

44 all high in DJF and at rush hours, while the latter one had high loadings in the daytime, especially  
45 when the ultra-violet (UV) was high. Correlation analysis reveals the formation of secondary  
46 aerosols, especially PM<sub>2.5</sub>, under high O<sub>3</sub> and temperature conditions, and suggests a VOC-sensitive  
47 regime for photochemical production of O<sub>3</sub> in urban Nanjing in cold seasons. Backward trajectory  
48 analysis suggests the prevailing winds in Nanjing were northerly and easterly during cold seasons  
49 in 2016. Air masses from eastern without passing through the urban agglomeration and those from  
50 northern without crossing BTH regions were cleaner, but air masses from local regions were more  
51 polluted in winter. A case study for a typical O<sub>3</sub> and PM<sub>2.5</sub> episode in December 2016 demonstrated  
52 that the episode was generally associated with regional transport and stable weather system. Air  
53 pollutants were mostly transported from the western areas with high emissions and weather  
54 conditions are controlled by anticyclone and high pressure system in this region. This study further  
55 reveals the important effects of weather system and human activities on the environment in the YRD  
56 region, especially in the urban areas, and it's an urgent need for improving air quality in these areas.

## 58 1. Introduction

59 Particles, including black carbon (BC), PM<sub>2.5</sub>, and PM<sub>10</sub>, and trace gases, such as carbon monoxide  
60 (CO), ozone (O<sub>3</sub>), nitric oxide and nitrogen dioxide (NO<sub>x</sub>), and total reactive nitrogen (NO<sub>y</sub>, which  
61 includes NO<sub>x</sub>, aerosol nitrates (NO<sub>3</sub><sup>-</sup>), nitric acid (HNO<sub>3</sub>), N<sub>2</sub>O<sub>5</sub>, peroxyacetyl nitrate (PAN), and  
62 various nitrogen-containing organic compounds.), are important components in the troposphere  
63 because of their impacts on human health, biosphere and climate changes (e.g., Chameides et al.,  
64 1999a, b; Jerrett et al., 2009; Allen et al., 2012). Through long-range particle cycles, particles could

65 interact with atmospheric trace gases from complex sources, especially ozone and its precursors,  
66 disturbing the earth's radiation budget (Sassen, 2002), or providing reactive surfaces for  
67 heterogeneous reactions (Kumar et al., 2014), which leads to a great but hard problem for regional  
68 air quality (Zhang et al., 2008; van Donkelaar et al., 2010). ~~BC is mostly from incomplete~~  
69 ~~combustion of coal, diesel fuels, biofuels, and outdoor biomass burning (Bond et al., 2004).~~  
70 ~~Although BC accounts for a relatively small portion of the total mass concentrations of aerosol~~  
71 ~~particles in atmosphere, it plays a significant role in global radiation balance, both directly and~~  
72 ~~indirectly. Thus, BC could influence the global and region climate changes and atmospheric~~  
73 ~~environment substantially (Jacobson et al., 2002; Bond et al., 2013; Deng et al., 2010). Particulate~~  
74 ~~matters (PMs) originate from both natural and anthropogenic emission sources (Kaufman et al.,~~  
75 ~~2002). Due to prosperous economic development, rapid industrialization and urbanization in recent~~  
76 ~~decades, haze events have frequently occurred in the Beijing Tianjin Hebei (BTH) area, Yangtze~~  
77 ~~River Delta (YRD) and Pearl River Delta (PRD) regions, all of which were mainly caused by high~~  
78 ~~concentrations of particulate matter. Tropospheric ozone is a typical secondary air pollutant that is~~  
79 ~~related to its precursors NO<sub>x</sub> and VOCs (Crutzen, 1973) through several complicated reactions. O<sub>3</sub>~~  
80 ~~could impact tropospheric environment (Monks et al., 2015), and make significant contributions to~~  
81 ~~radiative forcing of climate (Intergovernmental Panel on Climate Change (IPCC), 2007).~~  
82 ~~Tropospheric O<sub>3</sub> precursors and the interactions between O<sub>3</sub> and its precursors in different~~  
83 ~~geographical locations are usually different, and thereby the characterizations of O<sub>3</sub> at different sites~~  
84 ~~can vary greatly (Xie et al., 2016). The impact of PMs and BC on surface ozone is a topic that has~~  
85 ~~attracted much attention. Jacobson (1998) reported that aerosols containing BC cores reduced~~  
86 ~~photolysis rates and resulted in a decrease in ozone concentrations by 5%–8% at ground level in~~

87 ~~Los Angeles. It is also found that a strong reduction in photolysis rate (10%–30%) due to BC-~~  
88 ~~containing aerosols (Castro et al., 2001) led to a decrease in surface ozone in Mexico City. Similar~~  
89 ~~results have been found in other studies simulating the effects of BC on surface ozone in China (Li~~  
90 ~~et al., 2011).~~—

91  
92 ~~—Over the decades, China is always one of the major source regions of particles, with BC and dust~~  
93 ~~emission accounting for up to 25% of the global anthropogenic sources (Streets et al., 2001; Tegen~~  
94 ~~and Schepanski, 2009). Relatively high levels of particle concentrations are mainly distributed in~~  
95 ~~Beijin-Tianjin-Hebei area (BTH), Yangtze River Delta (YRD), and Pearl River Delta (PRD) regions~~  
96 ~~(e.g., Zhang et al., 2008, 2012; Zhang et al., 2015), along with the rapid economic development.~~  
97 ~~These regions consistently have the highest emissions of anthropogenic precursors (e.g., Wang et~~  
98 ~~al., 2015; Wang et al., 2009b; Ding et al., 2013b; Zheng et al., 2010), which have led to severe~~  
99 ~~region-wide air pollution. Earlier studies on particles mostly focused on concentrations estimation,~~  
100 ~~the chemical characteristics, potential sources, as well as climate effects based on numerical~~  
101 ~~simulations (e.g., Wu et al., 2012; Song et al., 2014; Xiao et al., 2012; Yu et al., 2015; Kristjánsson,~~  
102 ~~2002; Liao and Seinfeld, 2005; Zhuang et al., 2010, 2013, 2013b, 2018). However, a better~~  
103 ~~understanding of spatial and temporal variations of particles can contribute to the adoption of~~  
104 ~~effective measures to reduce air pollution, and real-time monitoring data is essential to better obtain~~  
105 ~~the detailed variations (seasonal, monthly, and diurnal) on the city scale. In China, the research~~  
106 ~~based on PMs observations, especially in the polluted regions above, have gradually expanded since~~  
107 ~~2012 due to the establishment of China’s PM<sub>2.5</sub> air quality standards and gradual developments of~~  
108 ~~nationwide PMs observation. The research is mainly related to the temporal and spatial distribution~~  
109 ~~characteristics (e.g., Wang et al., 2015; Chen et al., 2016; Wu et al., 2012), and the effects of~~  
110 ~~meteorological variables on aerosols (e.g., Zhang et al., 2015; Yan et al., 2016; Huang et al., 2015).~~  
111 ~~In addition, many observations of BC have been made in the recent years, most of which~~  
112 ~~concentrated on the analysis of the concentration level and the temporal and spatial variations (e.g.,~~  
113 ~~Verma et al., 2010; Wang et al., 2011b; Zhang et al., 2012). Some also revealed the correlations of~~  
114 ~~carbonaceous aerosols (Pan et al., 2011; Zhuang et al., 2014b). Besides particles, because of the lack~~

115 of nationwide O<sub>3</sub> monitoring data in earlier years, O<sub>3</sub> and its precursors (NO<sub>x</sub>, NO<sub>y</sub>, CO and VOCs  
116 etc.) pollution situations can only be discerned from limited campaign-type measurements in certain  
117 developed regions, for instance, Beijing in BTH area (Shao et al., 2006; Lin et al., 2008; Meng et al.,  
118 2009), Guangzhou in PRD region (Zhang et al., 1998; Wang et al., 2003) and Lin'an in YRD region  
119 (Luo et al., 2000; Cheung and Wang 2001; Wang et al. 2001a, 2002, 2004; Guo et al. 2004b). Since  
120 2005, the number of photochemical studies through observation data has increased in the PRD  
121 region in the south (Xue et al., 2014a), the BTH area in the north (Han, 2011), and the YRD region  
122 in the east (Shi et al., 2015). However, large gaps and uncertainties remain in the knowledge of  
123 characteristics of regional particles and O<sub>3</sub> pollution and its mitigation strategies due to the  
124 complexity of main sources, interaction between different aerosols, and changing meteorology filed.

125  
126 ~~Most of earlier studies on particles were focused on concentrations estimation, the chemical~~  
127 ~~characteristics, potential sources, as well as climate effects of particulate matters based on numerical~~  
128 ~~simulations (Wu et al., 2012; Song et al., 2014; Xiao et al., 2012; Yu et al., 2015; Kristjánsson, 2002;~~  
129 ~~Liao and Seinfeld, 2005; Zhuang et al., 2010; 2013), while observation-based studies of particles~~  
130 ~~were relatively limited. In addition, although a good understanding of the characteristics of O<sub>3</sub> have~~  
131 ~~been gained in the BTH area and the PRD region (Wang et al., 2009; Zheng et al., 2010; Lin et al.,~~  
132 ~~2008) due to a relatively long history of research limited in the megacities, in the YRD region, there~~  
133 ~~were only very limited studies of O<sub>3</sub> made in urban areas in some YRD cities (Tu et al., 2007; Ding~~  
134 ~~et al., 2013; Xie et al., 2016), most of which were based on studies of O<sub>3</sub> measurement beginning in~~  
135 ~~the 1990s at Lin'an site, a rural region in the southeast YRD (Luo et al., 2000). And most of studies~~  
136 ~~in YRD on particles, or particulate matter, were done in the eastern YRD, close to Shanghai, and~~  
137 ~~mainly covered short periods of time. In the YRD region, the prevailing winds are from between~~  
138 ~~the northeast and southeast. Therefore, western YRD region is under a downwind condition. As~~  
139 ~~only few measurement studies have been conducted for western YRD (Tu et al., 2007), large~~

140 knowledge gaps still exist in our understanding of the characteristics and main sources of O<sub>3</sub> and  
141 particles (Ding et al., 2013) in the region, let alone their interactions.

142

143 China is always one of the major source regions of particles. Over recent decades, along with the  
144 rapid economic development and the growing demand of energy consumption, many areas in China  
145 are suffering from the elevated O<sub>3</sub> pollution. In the BTH area, the YRD region, and the PRD region,  
146 all of which are the economically vibrant and densely populated, high levels of ozone precursor  
147 emissions and O<sub>3</sub> pollution have become one of the major environment problems affecting the public  
148 (Chan and Yao, 2008; Zhang et al., 2009; Ma et al., 2012; Xie et al., 2016). Because of complex  
149 sources and chemical reactions, and relatively long atmospheric lifetimes of the pollutants in the  
150 atmosphere that favors regional and long range transport, all the pollutants are of great concern for  
151 regional air quality but are very difficult to control (Cooper et al., 2005; Zhang et al., 2008). The

152 YRD is located in the eastern part of the Yangtze River Plain, adjacent to the most polluted North  
153 China Plain, including large cities of Shanghai, southern Jiangsu and northern Zhejiang. Taking up  
154 only 2 percent of the land area in China, this region produces over 20 percent of China's Gross  
155 Domestic Product (GDP). Nanjing, as the capital of Jiangsu Province, lies in the middle of YRD. It  
156 covers an area over 6000 km<sup>2</sup>, with more than 7.3 million residents (<http://www.njtj.gov.cn/>). Being  
157 the second largest commercial center after Shanghai in YRD, even the East China, Nanjing is highly  
158 urbanized and industrialized, especially the urban area. In addition, the complex monsoon and  
159 synoptic weather may play an important role in air pollution transport and formation in Nanjing.  
160 Therefore, the urban atmosphere in Nanjing is also heavily polluted by local emissions and long-  
161 distance transport of pollutants, which affects regional climate and air quality (Huang et al., 2013;

162 Yi et al., 2015). Both particles and O<sub>3</sub> concentrations are found to be high in Nanjing, which affects  
163 regional climate and air quality (Zhang et al., 2009; Yi et al., 2015). Therefore Thus, the issue of air  
164 pollution in Nanjing deserves attentions. Previous studies using observation data in Nanjing often  
165 concentrated on characteristics of one of the particles (Deng et al., 2011; Shen et al., 2014; Zhuang  
166 et al., 2014b) or ozone and its precursors (Tu et al., 2007; Wang et al., 2008; An et al., 2015),  
167 describing the temporal and spatial distributions, and the influence of meteorological effects, but  
168 lay less emphasis on the inter-species correlations and the combined effects of pollutants during  
169 severe pollution episodes. Ding et al. (2013b) described the characteristics of O<sub>3</sub> and PM<sub>2.5</sub> with  
170 near-surface observation data in rural Nanjing, but the detailed characteristics in urban Nanjing is  
171 not clear enough so far.

172  
173 To fill the knowledge gap, continuous online measurements of particles, trace gases, and other  
174 relevant parameters were carried out at Gulou site in urban Nanjing about 80m above the ground,  
175 an integrated measurement platform for the study of atmospheric environment and climate change.  
176 In this study, 6-month measurement of particles, trace gases, and other related variables at this site  
177 during September 2016~ February 2017 when air pollution occurred frequently is analyzed. Our  
178 work gives a synthetic analysis about their characteristics. The emphasis of our objective is to  
179 improve the insight in the characteristics, interactions of main pollutants, and the influence of  
180 integrated meteorology variables based on the observation data at an urban site above ground, and  
181 further investigate the possible underlying reasons and mechanisms. Firstly, an in-depth discussion  
182 on particles variations is performed, not limited to the concentrations but taking optical properties  
183 into consideration as well, to quantify the polluted level in detail. Secondly, a detailed description  
184 of O<sub>3</sub> variations can also be found in our study, including the analysis of the main precursors as trace  
185 gases (NO<sub>x</sub>, NO<sub>y</sub> and CO), to have a general and quantitative insight in O<sub>3</sub> pollution situations. Both  
186 of the pollutants are analyzed considering the effects of meteorology variables including but not  
187 limited to precipitation and temperature. Thirdly, analysis of inter-species correlations gives a



188 relatively thorough overview of the interactions among various species, and deduction of the  
189 underlying chemical mechanisms based on the results of our study and previous studies is also  
190 presented in our study. Moreover, backward trajectories analysis is conducted for improving the  
191 knowledge of regional/sub-regional transport process in urban Nanjing. Finally, a case study for  
192 high particles and O<sub>3</sub> episode is implementing to emphasize the integrated influence of  
193 meteorological field on regional air pollution.

194  
195 In the following, we describe the methodology in Section 2, which includes the measurement site  
196 and instruments. Results and discussions are presented in Section 3, consisting of overall temporal  
197 variation, correlation analysis, backward trajectory analysis, and case studies. A summary is given  
198 in Section 4.

199 ~~In this study, continuous observations of particles, trace gases and certain aerosol optical properties~~  
200 ~~at an urban station in Nanjing (a typical developing city in YRD) have been made in order to~~  
201 ~~characterize the air pollution in the city. In the following, we describe the methodology in Section~~  
202 ~~2. Results and discussions are presented in Section 3, followed by Conclusions in Section 4.~~

## 203 **2. Methodology**

### 204 **2.1 Brief Introduction to the Urban Atmospheric Observational Station**

205 The Urban Atmospheric Observational Station is a regional atmospheric urban station located on  
206 the Gulou Campus of Nanjing University in the downtown area of Nanjing (32.05 °N,118.78 °E),  
207 and run by School of Atmospheric Sciences, Nanjing University. It is built on the roof of a 79.3m  
208 tall building, without any industrial pollution sources within a 30 km radius around but several main  
209 roads with evident traffic pollution, especially during rush hours. The sketch map of the site (not  
210 shown) and the corresponding climatology have been described in Zhu et al (2012).

211

212 The Particles, O<sub>3</sub>, NO<sub>x</sub>, NO<sub>y</sub> (including most oxides of nitrogen mentioned above with the exception  
213 of NH<sub>3</sub> and N<sub>2</sub>O), CO, and wavelength-dependent aerosol optical parameters including aerosol  
214 aerosol scattering ( $\sigma_{ts}$ ), back-scattering ( $\sigma_{bs}$ ), and absorption ( $\sigma_a$ ) coefficients scattering (SC);  
215 ~~back scattering (Bsp), and absorption (AAC) coefficients~~ have been routinely measured at the  
216 station during the time period from 1 Sep 2016 to 28 Feb 2017. The  $\sigma_a$  ~~AAC~~ and concentrations  
217 of BC were derived from the measurements using a seven-channel Aethalometer (model AE-31,  
218 Magee Scientific, USA). The detailed calculation will be discussed below. The AE-31 model  
219 measures light attenuation (ATN) at seven wavelengths, including 370, 470, 520, 590, 660, 880 and  
220 950 nm. The sample air is taken through a stainless-steel tube into the instruments, with a desired  
221 flow rate of 5.0 L min<sup>-1</sup> and a sampling interval of 5 min during the whole period. The aerosol  $\sigma_{ts}$   
222 ~~SC~~ and  $\sigma_{bs}$  ~~Bsp~~ were measured with a three-wavelength-integrating Nephelometer (Aurora 3000,  
223 Australia). Aurora 3000 measures aerosol light scattering, including  $\sigma_{ts}$  and  $\sigma_{bs}$  at 450, 525 and  
224 635 nm, with a sampling interval of 1 min (Zhuang et al. 2017). The sample air was taken through  
225 a 2m stainless-steel tube with a sampling interval of 1 min, top of which is 1.5m above the roof. The  
226 inlet has a rain cap and an external as well as an internal heater to prevent condensation. In cold  
227 seasons when RH in the tube was relatively low, maximum of which was lower than 75% and most  
228 of which was lower than 50% during sunny hours, therefore the internal heater was turned off. ~~The~~  
229 ~~AE-31 model measures light attenuation at seven wavelengths, including 370, 470, 520, 590, 660,~~  
230 ~~880 and 950 nm, with a desired flow rate of 5.0 L min<sup>-1</sup> and a sampling interval of 5 min. Aurora~~  
231 ~~3000 measures aerosol light scattering, including SC and Bsp at 450, 525 and 635 nm, with a~~  
232 ~~sampling interval of 1 min (Zhuang et al. 2017); PM<sub>2.5</sub> and PM<sub>10</sub> mass concentrations were measured~~

233 using a mass analyzer (Thermo Instruments, THOM 1405-DF), which has been used to measure the  
234 mass concentration of PM<sub>2.5</sub>, PM<sub>2.5-10</sub>, and PM<sub>10</sub> simultaneously. The hourly and daily mean mass  
235 concentrations are updated every 6 minutes, as well as the hourly base and reference mass  
236 concentrations. The sample air is taken through a stainless-steel tube into the instruments. Trace  
237 gases (CO, NO<sub>x</sub>, NO<sub>y</sub> and O<sub>3</sub>) were measured every minute using online analyzers (Thermo  
238 Instruments, TEI 48i, 42i, 42iY, and 49i, respectively). Sample air was drawn from the 1.5m above  
239 the rooftop to the laboratory through a manifold connected to O<sub>3</sub>, NO<sub>x</sub> and CO analyzers with PFA  
240 Teflon tubes, while a separate sample line with a MoO converter was used for NO<sub>y</sub> analyzer (Wang  
241 et al., 2002; Ding et al., 2013b) to convert other reactive nitrogen species including PAN, NO<sub>3</sub><sup>-</sup> and  
242 HNO<sub>3</sub>. Thus, the measured quantity approximates total reactive nitrogen. Precision and instrument  
243 of the measurements in this study are listed in Table 1.

244  
245 Since aerosols are quite hygroscopic in China (e.g., Eichler et al., 2008; Liu et al., 2011; Ding et al.,  
246 2013b). All the instruments are installed in a laboratory with a constant temperature (24°C) and a  
247 low RH located on the building roof. Routine calibrations and maintenances were carried out for all  
248 these instruments during the sampling periods.

249  
250 Monthly averaged meteorological parameters during the period from Sep.2016 to Feb.2017 at the  
251 station are shown in Table 2. The air temperature at the site ranged from 6.64°C in Feb.2017 to  
252 24.88°C in Sep.2016. Both higher relative humidity (RH) and more precipitation occurred in fall  
253 than winter, especially in October. The relative humidity (RH) was higher in fall than in winter,  
254 especially in October, while the precipitation was heavier in fall than in winter. Visibility (Vis)

255 varied in different months. The peak of the ultraviolet radiation (UV) occurred in Sep.2016, after  
 256 which the radiation became weak till the end of Jan.2017, and rose a little afterwards in Feb.2017.  
 257

## 258 2.2 Calculation of the aerosol optical properties

259 The wavelength-dependent  $\sigma_a$  ~~AAC~~, which is associated with the intensities of the incoming light  
 260 and remaining light after passing through a medium, can be calculated directly using the measured  
 261 light attenuations (ATN) through a quartz filter matrix, a percentage to represent the filter  
 262 attenuation, as well as BC mass concentrations (Petzold et al., 1997; Weingartner et al., 2003; Arnott  
 263 et al., 2005; Schmid et al., 2006):

$$\begin{aligned}
 264 \quad \cancel{\sigma_{ATN, t}(\lambda)} &= \frac{(ATN_t(\lambda) - ATN_{t-1}(\lambda))}{\Delta t} \times \frac{A}{V} \\
 265 \quad \sigma_{a, ATN, t}(\lambda) &= \frac{(ATN_t(\lambda) - ATN_{t-1}(\lambda))}{\Delta t} \times \frac{A}{V}, \quad (1)
 \end{aligned}$$

266 where  $A$  (in  $m^2$ ) is the area of the aerosol-laden filter spot,  $V$  is the volumetric sampling flow rate  
 267 (in  $L \text{ min}^{-1}$ ) and  $\Delta t$  is the time interval (=5 min) between  $t$  and  $t-1$ .  ~~$\sigma_{a, ATN}$   $\sigma_{ATN}$~~ , known as  
 268  $\sigma_a$  ~~AAC~~ without any correction, is larger than the actual aerosol absorption coefficient  $\sigma_a^{abs}$  in  
 269 general. The key factors leading to the bias are as follows: (1). multiple-scattering of light at the  
 270 filter fibers (multiple-scattering effect), and (2) the instrumental response with increased particle  
 271 loading on the filter (shadowing effect). The former results in the overestimation of the  $\sigma$ , while  
 272 the later causes underestimation of the  $\sigma_a$ . Thus, the correction is needed and the calibration factors  
 273  $C$  and  $R$  (shown in Eq. 2) are introduced against the scattering effect and shadowing effect,  
 274 respectively:

275 ~~$$\sigma_{\text{abs}, t(\lambda)} = \frac{\sigma_{\text{ATN}, t(\lambda)}}{C \times R}, \sigma_{a, \text{abs}, t(\lambda)} = \frac{\sigma_{a, \text{ATN}, t(\lambda)}}{C \times R} \quad (2)$$~~

276 ~~$$R_t(\lambda) = \left(\frac{1}{f} - 1\right) \times \frac{\ln(\text{ATN}_t(\lambda)) - \ln 10}{\ln 50 - \ln 10} + 1, \quad (3) - (2)$$~~

277 ~~Previous investigation suggested that wavelength-dependent  $\sigma_a$  corrected by Schmid (Schmid et~~  
 278 ~~al., 2006, SC2006 for short, hereinafter) might be the closest to the real ones in Nanjing (Collaud~~  
 279 ~~Coen et al., 2010; Zhuang et al., 2015). Therefore, the SC2006 is adopted in this study. In this study,~~  
 280 ~~the parameters in the correction procedure are derived from local optical properties ( $\omega_0$  and  $\alpha_{ts}$~~   
 281 ~~were set to 0.922 and 1.51, respectively). The values of correction factors  $C$  and  $R$  are as follows:~~  
 282  ~~$R=1$  when  $\text{ATN} \leq 10$  and  $f=1.2$ , and  $C$  in Nanjing is 2.95, 3.37, 3.56, 3.79, 3.99, 4.51 and 4.64 at 370,~~  
 283 ~~470, 520, 590, 660, 880 and 950 nm (Zhuang et al., 2015).~~

284 ~~Weingartner (Weingartner et al., 2003, WC2003 for short, hereinafter), Arnott (Arnott et al., 2005),~~  
 285 ~~Schmid (Schmid et al., 2006, SC2006 for short, hereinafter), and Virkkula (Virkkula et al., 2007)~~  
 286 ~~corrections, have been developed to eliminate the uncertainties. Zhuang et al. (2015) further~~  
 287 ~~suggested that wavelength-dependent AACs corrected by SC2006 might be closer to the real ones~~  
 288 ~~than WC2003s in Nanjing, although 532 nm AACs from these two corrections are close to each~~  
 289 ~~other.~~  
 290 ~~Therefore, AACs corrected from SC2006 are used in this study.~~

291  
 292 ~~Measurement of Aurora 3000, a nephelometer with newly designed light sources based on light~~  
 293 ~~emitting diodes, needs correction using Mie-theory for measurement artifacts. In this study,~~  
 294 ~~correction was performed according to Müller et al. (2011). The raw total scattering coefficients~~  
 295 ~~were corrected first by calculating first the Ångström exponents from the non-corrected scattering~~  
 296 ~~coefficients and then following the formulas presented by Müller et al. (2011) where the tabulated~~

297 factors for no cutoff at the inlet were used, and the raw backward scattering coefficients were  
 298 corrected according to the correction factors for no cutoff. And based on corrected wavelength-  
 299 dependent  $\sigma_a$  and  $\sigma_{ts}$ ,  $\alpha_{ts}$  and  $\alpha_a$  at 550 nm are estimated by the following:

$$300 \quad \alpha_{a,470/660nm} = -\log(\sigma_{a,470nm} / \sigma_{a,660nm}) / \log(470/660), \quad (4)$$

$$301 \quad \alpha_{ts,450/635nm} = -\log(\sigma_{ts,450nm} / \sigma_{ts,635nm}) / \log(450/635), \quad (5)$$

302  
 303 Meanwhile, aerosol asymmetry parameter ( $g$ ), single-scattering albedo ( $\omega_0$ ) and extinction  
 304 coefficient ( $\sigma_e$ ) are further estimated:

$$305 \quad \omega_0 = \frac{\sigma_{ts}}{\sigma_{ts} + \sigma_a}, \quad (6)$$

$$306 \quad \sigma_e = \sigma_{ts} + \sigma_a, \quad (7)$$

307  
 308 ~~Measurement of Aurora 3000, a nephelometer with newly designed light sources based on light~~  
 309 ~~emitting diodes, needs correction using Mie theory for measurement artefacts. Müller et al. (2011)~~  
 310 ~~provided parameterizations for the angular sensitivity functions of Aurora 3000, which follows the~~  
 311 ~~definition of correction factors from Anderson and Ogren (1998), where the ratios of true to~~  
 312 ~~measured nephelometer values for both total scattering and backscattering are defined by:~~

$$313 \quad C_{ts,\lambda} \equiv \frac{\sigma_{ts,\lambda}^{true} \sigma_{tsR,\lambda}^{neph}}{\sigma_{ts,\lambda}^{neph} \sigma_{tsR,\lambda}^{true}}, \quad (4)$$

314 ~~and~~

$$315 \quad C_{bs,\lambda} \equiv \frac{\sigma_{bs,\lambda}^{true} \sigma_{bsR,\lambda}^{neph}}{\sigma_{bs,\lambda}^{neph} \sigma_{bsR,\lambda}^{true}}, \quad (5)$$

316 ~~where  $\sigma_{ts}^{true}$  and  $\sigma_{bs}^{true}$  are true total scattering coefficient and backscattering coefficient for ideal~~

317 angular sensitivity functions, respectively,  $\sigma_{tsR,\lambda}$  and  $\sigma_{bsR,\lambda}$  are Rayleigh total scattering  
318 coefficient and backscattering coefficient, respectively, and  $\sigma_{ts}^{neph}$  and  $\sigma_{bs}^{neph}$  are nephelometer  
319 total scattering coefficient and backscattering coefficient, respectively. In this study, we assume that  
320 Rayleigh scattering is equivalent to true scattering.

321  
322 The correction factors can be calculated using measured size distributions or SAE. Anderson and  
323 Ogren (1998), hereinafter denoted as AO98, found a dependency between the SAE and the  
324 correction factor for total scattering. The correction was given by:

$$325 \quad C_{ts} = a + b \cdot \alpha_{ts}^* \quad (6)$$

326 where  $\alpha_{ts}^*$  is the scattering Ångström exponent derived from uncorrected nephelometer scattering.  
327 According to Müller et al. (2011), for backscattering, there was no correlation between correction  
328 factors and scattering Ångström exponents, which is in agreement with AO98. The parameters  $a$   
329 and  $b$  were derived from Mie-calculated true scattering and simulated nephelometer scattering for  
330 ranges of particle sizes and refractive indices.

331  
332 In this study, we used the correction factors for Aurora 3000 without a sub- $\mu\text{m}$  cut in Müller et al.  
333 (2011), which are shown in the Table 3. According to nephelometer correction factors for angular  
334 nonidealities, which are shown in Table 3(a), original scattering coefficient (SC at 635 nm, 525 nm  
335 and 450 nm) and backscattering coefficient (Bsp at 635 nm, 525 nm and 450 nm) obtained from  
336 the measurements are corrected based on Eqs (4) and Eqs (5). We also calculated correction factors  
337 for total scatter as function of Ångström exponent shown in Table 3.(b), original scattering  
338 coefficient (SC at 635 nm, 525 nm and 450 nm) are corrected based on Eqs (6).

339

340 Based on corrected wavelength-dependent AAC and SC, SAE and AAE are estimated by the  
341 following:

$$342 \text{AAE}_{470/660\text{nm}} = \log(\text{AAC}_{470\text{nm}} / \text{AAC}_{660\text{nm}}) / \log(470 / 660), \quad (7)$$

$$343 \text{SAE}_{450/635\text{nm}} = \log(\text{SC}_{450\text{nm}} / \text{SC}_{635\text{nm}}) / \log(450 / 635), \quad (8)$$

$$344 \sigma_{\lambda} = \sigma_{\lambda_0} \times \left(\frac{\lambda}{\lambda_0}\right)^{-\alpha}, \quad (9)$$

345 where  $\sigma_{\lambda}$  is the coefficient at wavelength  $\lambda$  and  $\alpha$  is the corresponding Ångström exponents.

346

347 On the basis of Eqs (7)~Eqs (9), SC and Bsp at 550 nm were calculated for comparison. Between  
348 the two ways of corrections, the results of the total scattering coefficients are in agreement with  
349 each other in general, with differences of 10.67%. In this study, we choose the results from the  
350 correction using SAE.

351 Meanwhile, based on wavelength-dependent SC, Bsp, AAC, aerosol asymmetry parameter (ASP),  
352 single scattering albedo (SSA) and extinction coefficient (EC) are further estimated:

$$353 \text{ASP}_{\lambda} = -7.143889\beta_{\lambda}^3 + 7.46443\beta_{\lambda}^2 - 3.9356\beta_{\lambda} + 0.9893, \quad (10)$$

$$354 \text{SSA}_{\lambda} = \frac{\text{SC}_{\lambda}}{\text{SC}_{\lambda} + \text{AAC}_{\lambda}}, \quad (11)$$

$$355 \text{EC}_{\lambda} = \text{SC}_{\lambda} + \text{AAC}_{\lambda}, \quad (12)$$

356 where is  $\beta_{\lambda}$  the ratio of Bsp to SC at wavelength  $\lambda$ . Equation (10) is derived from Andrews et al.  
357 (2006).

358 Table 4 shows the statistical summary of the surface aerosol optical properties in Nanjing after the  
359 correction. The mean value during the cold seasons in 2016 of AAC, SC, Bsp, EC, SSA and ASP  
360 at 550 nm, AAE at 470/660 nm and SAE at 450/635 nm are 23.741, 349.502, 35.469, 373.536 Mm<sup>-1</sup>



361 ~~±, 0.929, 0.645, 1.600, and 1.192, with a standard deviation of 15.556, 235.291, 21.488, 247.877~~  
362 ~~Mm<sup>-1</sup>, 0.028, 0.052, 0.175, and 0.288, respectively.~~

363

### 364 **2.3 HYSPLIT model**

365 In order to understand the general transport characteristics of air masses recorded at this station, we  
366 conducted a 4 d (96 h) backward trajectory simulations during the cold seasons in 2016 using a  
367 Lagrangian dispersion model Hybrid Single-Particle Lagrangian Integrated Trajectory (HYSPLIT)  
368 (version 4.9) provided by the Air Resource Laboratory (ARL) of the USA National Oceanic and  
369 Atmospheric Administration (NOAA) (Draxler and Hess, 1998). HYSPLIT - 4 Model is capable of  
370 processing multiple gas input fields, multiple physical processes and different types of pollutant  
371 emission sources and has been widely used in the study of transport and diffusion of various  
372 pollutants in various regions (Mcgowan and Clark, 2008; Wang et al., 2011; Wang et al., 2015). It  
373 is one of the most extensively used atmospheric transport and dispersion models for the study of air  
374 parcel trajectories (Draxler and Rolph, 2013; Stein et al., 2016). In this study, backward trajectories  
375 were calculated and clustered using a stand-alone version of [the GDAS \(Ground Data Acquisition](ftp://arlftp.arlhq.noaa.gov/pub/archives/gdas1)  
376 [System\) meteorological field \(ftp://arlftp.arlhq.noaa.gov/pub/archives/gdas1\)](ftp://arlftp.arlhq.noaa.gov/pub/archives/gdas1) ~~the NCEP / NCAR~~  
377 ~~reanalyzed meteorological field (http://ready.arl.noaa.gov/archives.php)~~. The [NCEP-GDAS](http://ready.arl.noaa.gov/archives.php) data  
378 contains 6-hourly basic meteorological fields on pressure surfaces, with the spatial resolution of  
379 ~~2.51.0°~~, corresponding to the 00, 06, 12, 18 UTC, respectively. In this study, the data are also  
380 converted to hemispheric 144 by 73 polar stereographic grids, which is the same grid configuration  
381 as the dataset applied in synoptic weather classification. For each synoptic weather pattern, the

382 backward trajectories were started at Gulou station in Nanjing (32°N, 118.8°E).

### 383 3. Results and discussion

#### 384 3.1 Characteristics of particulate matter in Nanjing

385 The hourly-mean concentrations of particles at Gulou site during the cold seasons in 2016 are shown  
386 in Fig 1. Gaps in the time series are missing values.

387 Observations show that peaks and valleys of BC, PM<sub>2.5</sub> and PM<sub>10</sub> occur simultaneously in general  
388 (Fig 1a), probably because the three particles originate mostly from the same sources, i.e., fossil  
389 fuel burning and traffic activities. It has also been addressed in previous work (e.g., Wang et al.,  
390 2008; Chow et al., 2011; Schleicher et al., 2013; Zhuang et al., 2014b; Gong et al., 2015).

391 ~~The averaged values of BC, PM<sub>2.5</sub> and PM<sub>10</sub> during the study period are  $2.6 \pm 1.7$ ,  $58.2 \pm 36.8$ , and~~  
392  ~~$86.3 \pm 50.8$   $\mu\text{g}/\text{m}^3$ , respectively. The average of particulate matter concentrations during the study~~  
393 ~~period are higher than standard concentrations, which are  $35$   $\mu\text{g}/\text{m}^3$  for fine and  $70$   $\mu\text{g}/\text{m}^3$  for PM<sub>10</sub>.~~  
394 ~~Particles, including BC, PM<sub>2.5</sub> and PM<sub>10</sub> fluctuate similarly, because the three particles originate~~  
395 ~~mostly from the same sources, i.e., transport emissions. BC loadings at Gulou were low in~~  
396 ~~September and October, usually below  $6$   $\mu\text{g}/\text{m}^3$ , while the loadings were high in the other months,~~  
397 ~~such as in mid-November, early and late December, early January, and mid-to-late February,~~  
398 ~~suggesting occurrences of BC pollution events during these periods. PM<sub>2.5</sub> loadings and PM<sub>10</sub>~~  
399 ~~loadings were generally below  $120$  and  $200$   $\mu\text{g}/\text{m}^3$ , respectively, but higher during early October~~  
400 ~~and in the periods when BC loadings were high. The particle concentrations are affected by various~~  
401 ~~factors and progress. For example, the high loadings of particulate matter in early October was~~  
402 ~~mainly due to the increase in aerosols concentrations with high scatter coefficient (SC), and thus the~~

403 ~~BC loadings did not show such peak during early October.~~

404

405 BC concentration ranged from 0.064 to 15.609  $\mu\text{g}/\text{m}^3$ . Seasonal mean of BC concentration was

406 2.126  $\mu\text{g}/\text{m}^3$  in SON and 3.083  $\mu\text{g}/\text{m}^3$  in DJF, with a standard deviation of 1.457 and 1.827  $\mu\text{g}/\text{m}^3$ ,

407 respectively. It was low in September and October, usually below 6  $\mu\text{g}/\text{m}^3$ , but higher in other

408 months. Although BC concentration was relatively low, it was extremely high in particular periods,,

409 such as in mid-November, early and late December, early January, and mid-to-late February,

410 suggesting occurrences of substantial BC pollution events.  $\text{PM}_{2.5}$  and  $\text{PM}_{10}$  concentration ranged

411 from 0.8 to 256.4  $\mu\text{g}/\text{m}^3$  and from 1.1 to 343.4  $\mu\text{g}/\text{m}^3$ , respectively. Seasonal mean of  $\text{PM}_{2.5}$

412 concentration was 43.1  $\mu\text{g}/\text{m}^3$  in SON and 73.2  $\mu\text{g}/\text{m}^3$  in DJF, with a standard deviation of 25.4 and

413 40.0  $\mu\text{g}/\text{m}^3$ , respectively.  $\text{PM}_{10}$  averaged 67.6  $\mu\text{g}/\text{m}^3$  in SON and 105.0  $\mu\text{g}/\text{m}^3$  in DJF, with a standard

414 deviation of 39.1 and 54.0  $\mu\text{g}/\text{m}^3$ , respectively.  $\text{PM}_{2.5}$  and  $\text{PM}_{10}$  concentration were generally below

415 120 and 200  $\mu\text{g}/\text{m}^3$ , respectively. Remarkable increases existed especially when BC concentration

416 was high. Additionally, the high concentrations of PMs in early October possibly resulted from the

417 increase in scattering aerosols, since absorption coefficient and BC, one of typical absorbing

418 aerosols, did not show such peak, while scatter coefficient experienced a sharp increase during that

419 period. It is found that both BC and PMs levels in Nanjing became lower compared to those in

420 earlier years, which is possibly due to the strengthening energy conservation and reduction of

421 pollution emissions from 2014. For instance, seasonal average in SON and DJF were reported 4339

422 and 4189  $\text{ng}/\text{m}^3$  in urban Nanjing during 2012 in Zhuang et al. (2014b), and Ding et al. (2013b)

423 stated a 1-year average about 75  $\mu\text{g}/\text{m}^3$  of  $\text{PM}_{2.5}$  in rural area of Nanjing from August 2011 to July

424 2012, while Wang et al. (2014) suggested that annual average of  $\text{PM}_{2.5}$  and  $\text{PM}_{10}$  were 75 and 135

425 µg/m<sup>3</sup> in Nanjing during 2013, respectively.

426

427 Monthly variations of particles in the cold seasons in 2016 were obvious (Fig.2). The concentrations  
428 increased from October to December and decreased a little afterwards but remained relatively high  
429 in January and February. High particle concentrations were observed from November to February  
430 while the low ones were in September and October. The lowestsmallest monthly concentrations of  
431 BC, PM<sub>2.5</sub>, and PM<sub>10</sub> occurred in October, being 1.8, 39.2, and 59.8 µg/m<sup>3</sup>, respectively, while the  
432 largest monthly concentrations occurred in December, being 3.7, 85.0, and 123.1 µg/m<sup>3</sup>,  
433 respectively, which were about twice of those in October. Monthly variations of BC were different  
434 from those in previous studies in YRD. For instance, Pan et al. (2011) pointed out an extremely high  
435 concentration in October in Mt. Huang, which was attributed to combustion of biomasses as well as  
436 the dynamic transport and stable planetary boundary layer (PBL) stratification in the transitional  
437 periods of the winter monsoon (October). For PMs, monthly behavior was basically similar to what  
438 has been reported in previous studies in YRD, increasing from September to December in general  
439 (Chen et al., 2016), except the decrease in October. In generalGenerally, there are two key factors  
440 that could impact particle concentrations: meteorology and emissions. Heavy precipitation with a  
441 strong scavenging effect in October when average rainfall was 3.1 mm, and the frequency of daily  
442 rainfall exceeding 50mm was over 30%might directly lead to small loadings of particles (Table.2),  
443 had a strong scavenging effect, which might directly lead to low levels of particles despite the  
444 influence of biomass burning addressed in Pan et al. (2011). Anthropogenic particle emissions from  
445 fossil fuel over China increased after summer and showed a sharp increase from November to  
446 January (Zhang et al., 2009), and emission rates in southwest (Sichuan basin), central to north, and

447 northeast China, as well as YRD and PRD were higher in winter (Zhuang et al., 2018), especially  
448 in residential, industry and power emissions (Li et al., 2017)which may explain the high partiele  
449 concentrations during those periods. And during the autumn harvest (September~ November),  
450 though not so much as that in summer, the crop burning emissions in still make contribution to  
451 pollutants (Yang et al., 2008). Yin et al. (2016) discussed the spatial distribution of crop residue  
452 burning from September to December in 2015, suggesting autumn crop residue burning in  
453 surrounding regions like Shandong, Anhui and Henan Provinces, thus, particles in Nanjing might  
454 also be subject to these large-scale burning of crop residues (Qian et al., 2014). According to Huang  
455 et al. (2012) and Li et al. (2016), spatiotemporal distribution of agricultural fire occurrences in China  
456 during 2003~ 2010 as well as 2012 has been presented associated with the spatial distribution of  
457 CO emission from residue open burning. Both of them suggested the crop residue burning in autumn  
458 is noteworthy and Jiangsu as well as the surrounding provinces are the regions with highest  
459 emissions. Besides, sub-regional transport also plays an important role, for example, in winter, air  
460 masses coming from North China Plain, which accounts for 31%, have high particles concentrations  
461 (Sect 3.4).

462 ~~Qian et.al (2014) believed that high particle loadings in Nanjing from late October to early~~  
463 ~~November resulted from the large-scale burning of crop residues. However, PM<sub>2.5</sub> and PM<sub>10</sub>~~  
464 ~~concentrations reached a relative maximal in early October, while the emission in October is relative~~  
465 ~~low compared to the following months (Zhang et al., 2009).~~

466

467 Substantial diurnal cycles of the particles are also observed (Fig.3). Particles levels were high during  
468 7:00~9:00 and 22:00~0:00 LT but low in afternoon (13:00~15:00 LT).BC levels were high at rush

469 hours (7~9 am and 8~11 pm) but low in afternoon (1~3 pm). High concentrations during 7:00~9:00  
470 LT Zhuang et al. (2014) mentioned that high BC concentrations in these times of the day might be  
471 caused by the vehicle emissions (as mentioned in Section 2, several main roads with apparent traffic  
472 pollution surround the station). A higher vehicle volume showed during 17:00~ 20:00 LT in Nanjing,  
473 while the high concentrations occurred during 22:00~ 0:00 LT. A lower temperature and a more  
474 stable atmosphere stratification after sunset (17:00~18:00 LT) often lead to frequent temperature  
475 inversion and low height of planetary boundary layer (Jiang et al., 2014), which is not conducive  
476 to the diffusion of pollutants, and the concentrations of particles accumulate and remain high from  
477 the evening to early morning. In addition, temperature was low after midnight, and the atmosphere  
478 stratification was stable. Therefore, it was easy for temperature inversion to appear, which was not  
479 conductive to the diffusion of pollutants, and the concentrations of particles accumulated and  
480 reached a peak at around 8 am. Atmosphere stratification became stable again as the temperature  
481 decreased after around 4 pm, which may also explain the peak during 9~11 pm (Qian et al., 2014).  
482 For low levels in afternoon, it is mainly induced by well-developed boundary layer. Because the  
483 atmosphere become less stable with the increasing temperature, and strong turbulent exchange as  
484 well as vertical diffusion are favorable to the diffusion of pollutants, particles concentrations  
485 decrease to a minimum in the afternoon. As to the low BC in afternoon, which occurred at around  
486 3 pm, it was mainly induced by well-developed boundary layer. Because the atmosphere became  
487 less stable with increasing temperature, and strong turbulent exchange and vertical diffusion were  
488 favorable to the diffusion of pollutants, BC concentrations decreased to a minimum in the afternoon.  
489 Similar phenomenon of PMs has been observed in previous studies in Nanjing (Chen et al., 2016;  
490 Ding et al., 2013b), while a different pattern is discussed in Pan et al. (2011) in Mt. Huang, a rural

491 site in YRD, due to different emission sources (less vehicle emission) and meteorology effects  
492 (effect of valley breezing). Fig. 3 also shows that the peak values of fine particle concentrations  
493 often occurred ~~one or two hours~~ 1~2 h later than those of BC concentrations, with high values at  
494 around 10 ~~am:00~~ and low values at around 5 ~~pm~~ 17:00 LT. According to Roberts and Friedlander  
495 (1976) and Khoder (2002), atmospheric photochemical reactions are extremely active under  
496 conditions of strong radiation and high temperature, especially during daytime, thus, during which  
497 more secondary aerosol particles (like sulfate particles) generated, so more secondary aerosol  
498 particles (like sulfate particles) are likely to generate, and the concentrations of fine particles in the  
499 atmosphere will increase. ~~When solar radiation was strong, ultra-fine particles generated during~~  
500 ~~photochemical reactions contributed greatly to the concentrations of aerosol particles.~~

501 ~~Generally, the diurnal cycles of BC had a bimodal distribution with two peaks, while PM<sub>2.5</sub> and~~  
502 ~~PM<sub>10</sub> had only one peak. However, both magnitude and temporal variations of particles were~~  
503 ~~changed in winter, and there is another peak at around 2 am (see S1), which was possibly due to~~  
504 ~~the affection of BC pollution episodes at night.~~

505

### 506 **3.2 Characteristics of gaseous pollutants in Nanjing**

507 Fig.4 shows hourly-mean concentrations of gaseous pollutants at Gulou during the cold seasons in  
508 2016, ~~in which, there were few gaps for invalid values.~~ In general, as main precursors of O<sub>3</sub>, NO<sub>x</sub>,  
509 NO<sub>y</sub>, and CO generally show different pattern with O<sub>3</sub>, such as when the precursors levels remained  
510 high from November to January, O<sub>3</sub> levels were relatively low (Xie et al., 2016; Wang et al., 2017).  
511 Also, the precursors concentrations varied greatly, especially in DJF (with several peaks), possibly

512 because of the frequent shifting of air masses from the clean interior continent and heavily polluted  
513 urban plumes in the heating period (normally from November to March in Northern China) (Pan et  
514 al., 2011).

515 Concentrations of trace gases, including CO (176~ 2852 ppb), NO<sub>x</sub> (2.7~ 80.0 ppb), NO<sub>y</sub> (3.6~  
516 158.4 ppb), and O<sub>3</sub> (0.2~ 235.7 ppb), varied a lot in the study period. Seasonal mean of O<sub>3</sub> was 42.3  
517 ppb in SON and 33.1 ppb in DJF, with a standard deviation of 40.1 and 24.4 ppb, respectively. The  
518 averaged concentrations during the fall and winter of CO, O<sub>3</sub>, NO<sub>x</sub> and NO<sub>y</sub> at the site are 851 ±  
519 384, 37.7 ± 33.5, 23.5 ± 14.7, and 32.8 ± 22.3 ppb, respectively. As shown in Fig.4, O<sub>3</sub>  
520 concentrations in the site were was extremely high during the entire-whole September in 2016, with  
521 a maximum over 200 ppb, and decreased sharply after mid-October, basically keeping a low level  
522 below 100 ppb, until early February when it began to increase, which was mainly due to the strong  
523 solar radiation and the high temperature lasting in September. O<sub>3</sub> concentrations began to increase  
524 in February because of enhanced solar radiation, after a low concentration period since late October,  
525 during which O<sub>3</sub> concentrations were below 100 ppb. Seasonal averages of NO<sub>x</sub> and NO<sub>y</sub> were 21.4  
526 and 28.6ppb in SON, with a deviation of 20.5, and 40.1 ppb, respectively. In DJF, mean  
527 concentrations of NO<sub>x</sub> and NO<sub>y</sub> were 27.6 and 37.0 ppb, with a deviation of 15.5 and 23.1 ppb. And  
528 seasonal averages of CO were 753 ppb in SON, and 950 ppb in DJF, with a deviation of 353 and  
529 388 ppb, respectively. The precursors concentrations were high from November to mid-January,  
530 and low in September. NO<sub>x</sub> and NO<sub>y</sub> have a similar pattern: the concentrations were high in  
531 November, December and February (Fig.5). Moreover, it is suggested that O<sub>3</sub> concentration is  
532 higher compared to the results in previous studies in Nanjing (Xie et al., 2016; An et al., 2015; Ding  
533 et al., 2013b), implying a more pressing environmental issue of near-surface O<sub>3</sub> problem in urban



534

area.

535

It is noticeable that the daily variation of CO concentrations was similar to that of BC. A remarkable

536

correlation between BC and CO is found in a number of studies (Jennings et al., 1996; Derwent et

537

al., 2001; Badarinath et al., 2007; Spackman et al., 2008), suggesting that both of the pollutants are

538

greatly affected by anthropogenic sources and biomass burning in eastern China.

539

540

Monthly variations of trace gases are shown in Fig.5. Fig.5 illustrates monthly variations of O<sub>3</sub>,

541

nitrogen oxides (NO<sub>y</sub> and NO<sub>x</sub>), and CO in the cold seasons in 2016. It is noticeable that the different

542

patterns occur in O<sub>3</sub> and its precursors. Observations show that O<sub>3</sub> concentration decreased after the

543

lasting extremely high level in September until November and increased a little afterwards. Highest

544

concentration of O<sub>3</sub> was found in September and lowest in November, being 74.8 and 23.4 ppb,

545

respectively. This pattern might be attributed to the solar radiation and emissions. For instance, in

546

September when solar radiation was strong (maximum UV over 55 W/m<sup>2</sup>), it would contribute

547

greatly to O<sub>3</sub> formation, and precursors were at relatively high levels (CO, NO<sub>x</sub>, and NO<sub>y</sub> were about

548

600, 15 and 20 ppb, respectively), though not as high as those in cold days. CO, NO<sub>x</sub> and NO<sub>y</sub>

549

peaked in December correspondingly at 1064, 31.8 and 41.7 ppb. The precursors reached the lowest

550

level in September, being 620, 14.5, and 20.8 ppb, respectively. In addition, the pattern of precursors

551

is analogous to those in previous studies (Xie et al., 2016; Ding et al., 2013b), but with a relatively

552

lower concentration, especially NO<sub>x</sub> and NO<sub>y</sub>, which might also result from the large-scale reduction

553

of pollution emissions.

554

O<sub>3</sub> peaked in September at 74.8 ppb while NO<sub>y</sub> and NO<sub>x</sub> peaked in December at 31.8 and 41.7 ppb,

555

respectively. O<sub>3</sub> reached minimum at 23.4 ppb in November and NO<sub>y</sub> and NO<sub>x</sub> were lowest in

556 September, being 14.5, and 20.8 ppb, respectively. O<sub>3</sub> is a secondary pollutant and complicatedly  
557 related to its precursors, including NO<sub>x</sub> and VOCs. O<sub>3</sub> precursors and their effects on O<sub>3</sub> formation  
558 are different at different geographical locations, and thus the characterizations of O<sub>3</sub> at different  
559 sites can vary greatly. O<sub>3</sub>-NO<sub>x</sub>-VOCs relationships can be described by the following reactions:

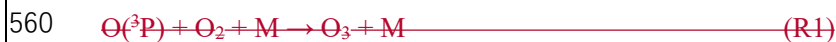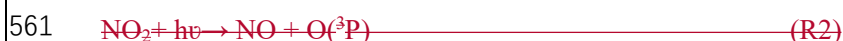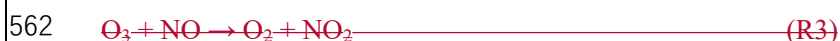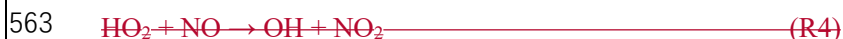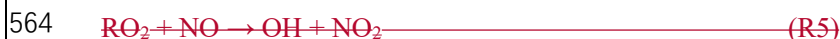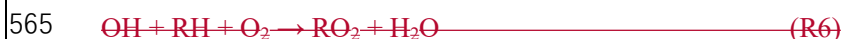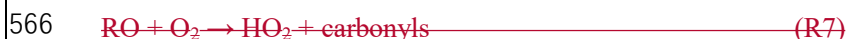

567 where (R4), (R5), and (R2) reactions establish an “NO<sub>x</sub>-cycle” that could produce O<sub>3</sub> without  
568 consumption of NO<sub>x</sub>, the other important chemistry cycle is the so-called “RO<sub>x</sub> (RO<sub>x</sub>=OH+HO<sub>2</sub>+  
569 RO<sub>2</sub>) radical cycle” that could continuously supply HO<sub>2</sub> and RO<sub>2</sub> to oxidize NO to NO<sub>2</sub>, and (R7)  
570 is usually referred as NO<sub>x</sub> titration, which is an important O<sub>3</sub> removal process related to freshly  
571 emitted NO. In general, when NO<sub>x</sub> concentrations were high, O<sub>3</sub> concentrations may experience a  
572 depression process since excessive NO are not favorable for the O<sub>3</sub> production (Xie et al., 2016;  
573 Wang et al., 2018). The CO concentrations varied greatly in winter because of the frequent shifting  
574 of air masses from the clean interior continent and heavily polluted urban plumes in the heating  
575 period (normally from November to March in Northern China, (Pan et al., 2011). In September and  
576 October, the CO concentrations at Gulou apparently decreased owing to frequent intrusions of clean  
577 air mass from the Pacific Ocean, and this seasonal trend was confirmed by HYSPLIT-4 model (see

578 ~~detailed discussion in Section.4).~~

579

580 Fig. 6 (a) shows the ~~mean~~ diurnal variations of the gaseous pollutants (O<sub>3</sub>, NO<sub>x</sub>, NO<sub>y</sub>, and CO) ~~at~~  
581 ~~Gulou during the cold seasons in 2016~~. The concentrations of O<sub>3</sub> ~~were~~ is the lowest around 7:00  
582 LT ~~am~~ and rises rapidly until reaching the peak in the middle of the day at 15:00 LT. went up  
583 rapidly corresponding with the increase of solar radiation. ~~After reaching the peak in the middle of~~  
584 ~~the day at 3 pm, It keeps decreasing sharply after the afternoon peak till sunset. During the nighttime,~~  
585 the concentration of O<sub>3</sub> decreases slowly and remains low. ~~the O<sub>3</sub> concentrations kept decreasing~~  
586 ~~rapidly until sunset. During the nighttime, the concentrations of O<sub>3</sub> decreased slowly and maintained~~  
587 ~~low values, attributed to the process of NO<sub>x</sub> titration and the lack of solar radiation~~. With respect to  
588 NO<sub>x</sub> and NO<sub>y</sub>, peak appears at around 9:00 LT, with another high value occurring at night (21:00~  
589 0:00 LT), both of which coincide with the rush hours in the city, when two peaks appeared in the  
590 ~~diurnal cycles, one around 9 am and the other at 8 pm. Both peaks coincided with the rush hours in~~  
591 ~~the city, during which~~ large amounts of vehicle emissions ~~were~~ are released. The morning peak  
592 is slightly higher than the ~~evening-night~~ one in general. ~~Besides emissions, According to Xie~~  
593 ~~et al. (2016), these diurnal variation patterns of O<sub>3</sub> and NO<sub>x</sub> are~~ mainly resulted from the  
594 photochemical processes and the meteorological conditions. Simultaneous measurement of O<sub>3</sub> and  
595 UV shows that the O<sub>3</sub> concentration is highly correlated to UV (R=0.71, Fig. 9(a)). The ultraviolet  
596 irradiance (UV) at Gulou ~~start~~ sed to increase at about 7-am:00 LT (Fig.6 (b)), which could induce a  
597 series of photochemical reactions including the formation of peroxy radicals (HO<sub>2</sub> and RO<sub>2</sub> etc.)  
598 and the photolysis of NO<sub>2</sub>. From 8-am:00 to 3-pm15:00 LT, the increase in UV ~~enhanced~~ enhances  
599 the O<sub>3</sub> formation by promoting the production processes of NO<sub>2</sub> and OH from NO and peroxy

600 radicals(R4)–(R5). Simultaneous measurement of O<sub>3</sub> and UV shows that the O<sub>3</sub> concentrations are  
601 highly correlated to UV, with a correlation coefficient of 0.47. The diurnal range of O<sub>3</sub> concentration  
602 (the difference between the maximum at 15:00 LT and the minimum at 7:00 LT) is relatively high  
603 (45.1 ppb), suggesting the active chemical reactions as well. It is also noticeable that ~~the~~ O<sub>3</sub> peaks  
604 ~~maximum was~~ 2 h after the UV maximum, suggesting the time to take for the chemical reactions.  
605 The slightly reduction of O<sub>3</sub> and NO<sub>x</sub> after the midnight in the early morning (3:00~7:00 LT) is likely  
606 due to ~~of~~ NO<sub>x</sub> titration. The development of the planetary boundary layer (PBL) can also modulate  
607 pollutant concentrations. The concentrations of a pollutant ~~are~~ is diluted when PBL rises during the  
608 daytime and enhanced in the low nocturnal PBL that favors pollutant accumulation, after comparing  
609 Fig.6 (a) with the reported diurnal variation of PBL height in Nanjing (Jiang et al., 2014; Xie et al.,  
610 2016). And that is also the reason for the difference of peak time between the emission rate and NO<sub>x</sub>  
611 (NO<sub>y</sub>) concentration, which is similar to particles to some degree. The abovementioned diurnal  
612 cycles in O<sub>3</sub> and NO<sub>x</sub> (NO<sub>y</sub>) concentrations follow the typical patterns at other sites in Nanjing (Tu  
613 et al., 2007; Ding et al., 2013b; Xie et al, 2016). The daily variation of CO concentration is found  
614 to be similar to that of BC, such as morning peak during rush hours, afternoon dip at around 15:00  
615 LT, and accumulation at night. A remarkable correlation has been found in a number of previous  
616 studies (e.g., Jennings et al., 1996; Derwent et al., 2001; Badarinath et al., 2007; Spackman et al.,  
617 2008; Pan et al., 2011; Zhuang et al., 2014b). Besides, BC is mostly produced by the incomplete  
618 combustion of carbonaceous material, and so is carbon monoxide (CO) (Pan et al., 2011), thus, both  
619 BC and CO might come from the same sources, mostly from combustions of domestic bio-fuel,  
620 industry-coal, and vehicle-gasoline (Zhuang et al., 2014b). The effect of meteorology, i.e., the  
621 development of PBL, influences the diurnal pattern as mentioned in Section 3.1, especially the

622 afternoon dip and night accumulation. Moreover, as one of main precursors of O<sub>3</sub>, increase in O<sub>3</sub>  
623 levels in the afternoon might also contribute to the lowest concentration at 15:00 LT.  
624  
625 Table ~~7-5~~ further provides the statistics of O<sub>3</sub>, PM<sub>2.5</sub> and PM<sub>10</sub> mass concentrations with a  
626 comparison to the National Ambient Air Quality Standards in China (NAAQS-CN), which were  
627 released in 2012 by the China State Council and will be implemented nationwide in 2016 (MEP,  
628 2012). According to NAAQS-CN for PM<sub>2.5</sub> and PM<sub>10</sub> (75 µg/m<sup>3</sup> of PM<sub>2.5</sub> concentrations and 150  
629 µg/m<sup>3</sup> of PM<sub>10</sub> concentrations for 24h average), there were 48 days of PM<sub>2.5</sub> exceedances,  
630 accounting for about 30% of the 6 months period, and 14 days of PM<sub>10</sub> exceedances, lower than the  
631 PM<sub>2.5</sub> exceedances. Days of ~~particulate-matter~~PMs exceedances mainly occurred during DJF. The  
632 days of exceedances decreased. ~~Donkelaar et al. (2010) reported that a multi-year average of PM<sub>2.5</sub>~~  
633 ~~mass concentrations was over 80 µg/m<sup>3</sup> in eastern China by using satellite data during 2001–2006,~~  
634 ~~and Ding et al. (2013b) reported stated 99 days of PM<sub>2.5</sub> exceedances in total from September 2011~~  
635 ~~to February 2012, and Wang et al. (2014) suggested that non-attainment rates in Nanjing from~~  
636 ~~September 2013 to February 2014 were over 40% and 70% in SON and DJF, respectively. an 1-~~  
637 ~~year average about 75 µg/m<sup>3</sup> in rural area of Nanjing from August 2011 to July 2012. Therefore, the~~  
638 ~~means in Table 7 show lower particle concentrations than what were reported. The days of~~  
639 ~~exceedances also were fewer than in 2011 (Ding et al., 2013), during which 99 days of PM<sub>2.5</sub>~~  
640 ~~exceedances happened during the cold seasons.~~ These results suggest that particles control policies  
641 are well-implemented in Nanjing although particles remain a severe pollution problem in the YRD  
642 region. According to NAAQS-CN for O<sub>3</sub> (160 µg/m<sup>3</sup> for 8 h average and 200 µg/m<sup>3</sup> for 1 h average),  
643 37 days of exceedances occurred (~~Table7~~Table 5), covering 20% of the period and mostly appearing

644 in September and February when the air temperature was relatively high. In contrast to particulate  
645 matter, ~~days of O<sub>3</sub> exceedances increases greatly. O<sub>3</sub> concentrations increased from 2011 to 2016,~~  
646 ~~and the exceedance days were 10 times of those in 2011. Wang et al. (2014) reported a 11.4%~~  
647 ~~contribution of O<sub>3</sub> as the major pollutant on non-attainment days in cold seasons in south-~~  
648 ~~east China, and Tu et al. (2007) reported frequency of days with O<sub>3</sub> exceedance for cold seasons in~~  
649 ~~2000~2002 in urban Nanjing was 6.3%. It was found in previous studies that~~ O<sub>3</sub> levels in the rural  
650 areas ~~were~~ are generally higher than those in the city centers (Zhang et al., 2008; Geng et al., 2008;  
651 Xie et al., 2016). Thus, high O<sub>3</sub> concentrations and severe air pollution in Gulou, an urban site,  
652 ~~probably suggest imply~~ a severer O<sub>3</sub> pollution problem in the entire YRD region. ~~Moreover, N~~note  
653 that this study only discussed the O<sub>3</sub> concentrations in the cold seasons when ~~the concentrations of~~  
654 ~~O<sub>3</sub> are lower than in the warm season it is relatively low, and it might suggest the problem can be a~~  
655 severer problem in the warm seasons. ~~The emissions of O<sub>3</sub> precursors (VOCs and NO<sub>x</sub>) in Nanjing~~  
656 ~~have significantly increased with the increases of residents (over 200,000 increase since 2011), the~~  
657 ~~number of automobiles (over 65% increase since 2011), and GDP (gross domestic production)~~  
658 ~~(nearly 70% increase since 2011). Consequently, O<sub>3</sub> concentrations at ground level has gradually~~  
659 ~~risen (<http://www.njtj.gov.cn/>).~~

660

### 661 3.3 Inter-species correlations

662 Correlations between different species ~~were~~ have been analyzed to help interpret the data and gain  
663 insights into the underlying mechanisms/processes. Because precipitation could impact wet  
664 scavenging processes for particles and other aerosols (~~see S2Table 6~~), the data in rainy condition

665 ~~has been eliminated. we eliminated the data in rainy condition.~~

666

667 The scatter plot of O<sub>3</sub> measured at the site and NO<sub>x</sub> color-coded with air temperature is given in

668 Fig.7 (a). ~~As discussed in previous studies (Xie et al., 2016; Ding et al., 2013b), measured O<sub>3</sub>~~

669 ~~presents an overall negative correlation with NO<sub>x</sub>.The negative correlation suggests a titration effect~~

670 ~~of freshly emitted NO with O<sub>3</sub> in the cold seasons. The negative correlation mainly exists for data~~

671 ~~of relatively low air temperature, suggesting a titration effect of freshly emitted NO<sub>x</sub> with O<sub>3</sub>,~~

672 ~~especially at nighttime. However, the slope gets less rigid when air temperature rises, and tend to~~

673 ~~be positive with a high temperature (over 25°C) and low level of NO<sub>x</sub> (below 30 ppb).In addition,~~

674 ~~the slope decreased when air temperature rose.~~ These results possibly suggest a strong

675 photochemical production of O<sub>3</sub> in this region under high temperature with strong radiation like in

676 September during high air temperature, leading to resulting in the seasonal cycle pattern of O<sub>3</sub> shown

677 in Fig. 5 (a) ~~(Ding et.al, 2013).~~

678

679 Fig.7 (b) provides a scatter plot of PM<sub>2.5</sub> and visibility (Vis) color-coded with relative humidity

680 (RH). Previous research has shown that visibility has a good correlation with the concentrations of

681 particles and relative humidity. For a better understanding of the relationship between the variables,

682 we have performed a linear fit of the visibility with the PM<sub>2.5</sub> concentration when RH ≤ 70%, 70%

683 <RH ≤ 80%, and 80% < RH ≤ 90%, to find out the relationship among these factors, and the fitting

684 curves are  $[PM_{2.5}] = 366.72[Vis]^{-0.745}$  ( $R^2 = 0.7196$ ),  $[PM_{2.5}] = 337.16[Vis]^{-0.855}$  ( $R^2 = 0.8692$ ), and

685  $[PM_{2.5}] = 248.6[Vis]^{-0.852}$  ( $R^2 = 0.8279$ ), respectively. It is found that visibility decreases with the

686 concentration of PM<sub>2.5</sub> in a power function with a negative exponent, and the inverse relationship

687 between visibility and aerosols concentrations as well as relative humidity has also been discussed  
 688 in previous studies based on the observations in YRD (e.g., Deng et al., 2011; Xiao et al., 2011;  
 689 Jiang et al., 2018). The correlation is stronger than that in Lin'an, a rural site not far from Nanjing  
 690 (Jiang et al., 2018). With an increase in the PM<sub>2.5</sub> concentrations, visibility decreases exponentially  
 691 (Fig.7 (b)), because tThe concentrations of particles would increase scattered and absorption  
 692 extinction coefficients, while the visibility (Vis) is related to the coefficients through:

$$693 \quad Vis = \frac{3.91}{\sigma} \quad (138)$$

694 where  $Vis$  is the visibility and  $\sigma$  is the extinction coefficient (EC) (Larson et.al, 1989). As for the  
 695 effect of relative humidity (RH) on the visibility, according to Mie theory, with the increase of the  
 696 relative humidity, the radius of the wet particle also increases, and so does the extinction coefficient,  
 697 which leads to the decrease in visibility increases. Therefore, the visibility decrease. Moreover,  
 698 when  $RH \leq 80\%$ , the effect of particle concentrations on visibility could become smog, and when  
 699  $80\% < RH \leq 90\%$ , the effect could form smog and fog at the same time. Thus, we performed a linear  
 700 fit of the visibility with differing concentrations of PM<sub>2.5</sub> when  $RH \leq 70\%$ ,  $70\% < RH \leq 80\%$ , and  
 701  $80\% < RH \leq 90\%$ , to find out the relationship among these factors. Although there is no precipitation,  
 702 there are still water droplets in the air when  $RH > 90\%$ , which become fog. Therefore, we eliminated  
 703 those data. It is found that the fitting curves are as follows:  $[PM_{2.5}] = 366.72[Vis]^{-0.745}$  ( $R^2 = 0.7196$ ),  
 704  $[PM_{2.5}] = 337.16[Vis]^{-0.855}$  ( $R^2 = 0.8692$ ), and  $[PM_{2.5}] = 248.6[Vis]^{-0.852}$  ( $R^2 = 0.8279$ ).

705

706 According to the scatter plots of PM<sub>2.5</sub>-O<sub>3</sub> and BC-O<sub>3</sub> color-coded with air temperature (Fig.8),  
 707 PM<sub>2.5</sub> and BC are negatively correlated with O<sub>3</sub> in general. To figure out the interaction between  
 708 particles and O<sub>3</sub>, we give scatter plots of PM<sub>2.5</sub>-O<sub>3</sub> and BC-O<sub>3</sub> (Fig.8), in which data points are



709 ~~color-coded with air temperature. Overall, particulate matters and black carbon are negatively~~  
710 ~~correlated with O<sub>3</sub>. It is also noticeable that a negative correlation between PM<sub>2.5</sub> and O<sub>3</sub> could be~~  
711 ~~found for low air temperature samples while a positive correlation exists for those under a high~~  
712 ~~temperature. Similar results were also found at a rural site in Nanjing (Ding et al., 2013b). Besides,~~  
713 ~~BC is in a negative correlation with O<sub>3</sub> under low air temperature, but tend less-correlated with O<sub>3</sub>~~  
714 ~~when the temperature rises. PM<sub>2.5</sub> is well-correlated with O<sub>3</sub> precursors, such as NO<sub>x</sub> (Fig.10 (b))~~  
715 ~~and CO. Therefore, the anti-correlation in Fig.8 (a) for cold air is likely due to the titration effect of~~  
716 ~~high NO concentrations associated with high primary PM<sub>2.5</sub> levels. And~~ Additionally, the increasing  
717 ~~slope under ~~the positive correlation for high air temperature is~~ might be related to the formation of~~  
718 ~~secondary fine particles associated with high concentrations of O<sub>3</sub>, which may be related~~  
719 ~~to especially the high conversion rate of SO<sub>2</sub> to sulfate under the effect of high concentrations of~~  
720 ~~oxidants (Khoder, 2002 O<sub>3</sub>) and solar radiation (Roberts and Friedlander, 1976; Khoder, 2002).~~  
721 ~~Previous studies of PM<sub>2.5</sub> chemical compositions in Shanghai and Nanjing (Wang et al., 2002, 2006)~~  
722 ~~and Nanjing (Ding et al., 2013b) suggested that sulfate was the most dominate ion in PM<sub>2.5</sub>. Ding et~~  
723 ~~al. (2013b) also suggested formation of secondary organic aerosols with high O<sub>3</sub> concentration could~~  
724 ~~lead to the positive correlation because biogenic emission of VOCs is high under a condition of high~~  
725 ~~air temperature and solar radiation in summer. However, the study is performed during cold seasons~~  
726 ~~when air temperature is relatively lower and the biogenic emission of VOCs are likely lower, so the~~  
727 ~~positive correlation is less pronounced. As for BC, it also shows a good correlation with NO<sub>x</sub> (Fig.10~~  
728 ~~(c)) and CO, which contributes to the inverse correlation for cold air. Since ~~black carbon~~ BC is~~  
729 ~~insoluble in polar and non-polar solvents and remains stable when air or oxygen is heated to 350 ~~~  
730 ~~400°C, it's hard ~~it cannot to be generated nor cleared through chemical reactions. And that is~~~~

731 ~~probably the reason why~~ Thus, when air temperature rises, the correlation between BC and O<sub>3</sub>  
732 ~~becomes~~ is obscurer compared to the one between PM<sub>2.5</sub> and O<sub>3</sub> when air temperature rises.  
733 Moreover, as shown in Fig.9, O<sub>3</sub> is well correlated with UV (daily averages are used due to the  
734 remarkable diurnal variation), suggesting the significant role UV plays in O<sub>3</sub> production, while  
735 PM<sub>2.5</sub> is generally negatively correlated with UV. Previous findings based on various numerical  
736 models also suggest that particles can affect actinic flux of UV radiation, and inhibit the photolysis  
737 reactions near surface in reducing the photolysis frequencies in the atmosphere, like the frequency  
738 of O<sub>3</sub> → O(<sup>1</sup>D) (e.g., Li et al., 2005; Deng et al., 2010; Li et al., 2011; Li et al., 2018). In central  
739 Nanjing, as implied in Li et al. (2017), high concentrations of aerosols could result in a 0.1–5.0 ppb  
740 (12.0%) reduction of near-surface O<sub>3</sub>. Thus, they might result in the decrease of O<sub>3</sub> concentration  
741 near the ground to some degree. because particulates inhibit the photolysis reactions near the surface,  
742 reducing the photolysis frequencies in the atmosphere, and resulting in the decrease of O<sub>3</sub>  
743 concentrations near the ground, which is also addressed using the chemical transport model (HANK)  
744 (Li et al., 2005). It is noticeable that a negative correlation could be found for low air temperature  
745 samples while a pronounced positive correlation existed for high temperature data points. The  
746 negative correlation for cold air is mainly due to the titration effect of high NO concentrations,  
747 which was associated with high primary PM<sub>2.5</sub> in the cold seasons as well. And the positive  
748 correlation for high air temperature is related to the formation of secondary fine particles associated  
749 with high concentrations of O<sub>3</sub>, which may be related to high conversion rate of SO<sub>2</sub> to sulfate under  
750 high concentrations of oxidants (Khoder, 2002). Previous studies of PM<sub>2.5</sub> chemical compositions  
751 in Shanghai and Nanjing (Wang et al., 2002, 2006) suggested that sulfate was the most dominate  
752 ion in PM<sub>2.5</sub>. However, Tthe detailed mechanisms still need to be further investigatedaddressed by

753 long-term measurement of aerosol chemical composition combined with numerical models. ~~Since~~  
754 ~~black carbon is insoluble in polar and non-polar solvents and remains stable when air or oxygen is~~  
755 ~~heated to 350–400°C, it cannot be generated nor cleared through chemical reactions. Thus, when~~  
756 ~~air temperature rises, the correlation between BC and O<sub>3</sub> becomes obscurer compared to the one~~  
757 ~~between PM<sub>2.5</sub> and O<sub>3</sub>.~~

758

759 Scatter plots of CO–NO<sub>x</sub>, PM<sub>2.5</sub>–NO<sub>x</sub>, and BC–NO<sub>x</sub>, are given in Figs. 910 (a)–(c), with data  
760 points color-coded with concentrations of O<sub>3</sub>. Fig. 910 (b) and (c) show a good positive correlation  
761 between PM<sub>2.5</sub> and NO<sub>x</sub>, as well as BC and NO<sub>x</sub> as mentioned above, suggesting that the particles  
762 at the site ~~in Nanjing University Gulou Campus were~~ are mainly associated with combustion sources  
763 (Wang et al., 2006; Ding et al., 2013b; Zhuang et al., 2014b), ~~which is also the reason for the~~  
764 ~~negative correlation between particles and O<sub>3</sub>~~. It is found that high O<sub>3</sub> levels are generally associated  
765 related with to air masses of high CO/NO<sub>x</sub> or particles/NO<sub>x</sub> ratio. An increase in CO, as well as  
766 PM<sub>2.5</sub> and BC, always results in higher O<sub>3</sub> concentration for NO<sub>x</sub> lower than 40 ppb, while NO<sub>x</sub>  
767 reverses. and when NO<sub>x</sub> concentrations was lower than 40 ppb, an increase in CO or particulate  
768 matter concentrations would cause a sharp increase in O<sub>3</sub> concentrations while NO<sub>x</sub> reverses. To be  
769 specific, when NO<sub>x</sub> reduces for CO lower than 1500 ppb, O<sub>3</sub> has a sharp increase, and an increase  
770 in the CO level would lead to an in increase in the O<sub>3</sub> concentration, especially when NO<sub>x</sub> is lower  
771 than 40 ppb. The concentration of O<sub>3</sub> is sensitive to the level of its precursors, and the O<sub>3</sub> formation  
772 regime often includes NO<sub>x</sub>-sensitive O<sub>3</sub> formation regime and VOCs-sensitive O<sub>3</sub> formation regime.  
773 If O<sub>3</sub> formation is under VOC-sensitive regime, a reduction in the NO<sub>x</sub> concentration will lead to an  
774 increase in the O<sub>3</sub> concentration, which is used to determine the O<sub>3</sub> photochemical production in the

775 region is VOC-limited or NO<sub>x</sub>-limited based on observation data (Geng et al., 2008; Ding et al.,  
776 2013b). In our study, we have no VOCs measurement, thus CO is chosen as the reference tracer,  
777 because mixing ratios of CO showed significant correlations with the measured levels of most  
778 anthropogenic VOCs, which has been verified in many previous studies (e.g., Baker et al., 2008;  
779 von Schneidmesser et al., 2010; Wang et al., 2014). In addition, as a significant precursor of O<sub>3</sub>,  
780 CO also plays a similar role as VOCs. HO<sub>2</sub> produced from the oxidation reaction of CO with OH  
781 radicals could initiate photochemical reactions which result in the net formation of O<sub>3</sub> (Novelli et  
782 al., 1998; Atkinson et al., 2000; Gao et al., 2005). Thus, the CO–O<sub>3</sub>–NO<sub>x</sub> relationship may reflect  
783 the correlation of VOCs, NO<sub>x</sub> and O<sub>3</sub> in this region to some degree. And we suggest that the region  
784 is VOC-sensitive. As discussed in Atkinson et.al (2000), volatile organic compounds (VOCs)  
785 generally have good correlation with CO and play a role similar to CO in the photochemical ozone  
786 production. Particles also have good correlation with CO, so the particles–O<sub>3</sub>–NO<sub>x</sub> relationship may  
787 indicate a VOC-sensitive regime of O<sub>3</sub> formation in this region, as the CO–O<sub>3</sub>–NO<sub>x</sub> relationship.  
788 Geng et al. (2008) reported a VOC-sensitive regime in Shanghai combining the measured and  
789 modeling results by using measured and modeling results, and Ding et al. (2013b) also reported a  
790 VOC-sensitive regime in rural ~~area in~~ Nanjing using the observation data. And the PM<sub>2.5</sub>–O<sub>3</sub>–NO<sub>x</sub>  
791 and BC–O<sub>3</sub>–NO<sub>x</sub> relationship show the similar pattern, possibly because they are well-correlated  
792 with CO.

793

794 ~~Correlations of PM<sub>2.5</sub>–O<sub>3</sub> in daytime when UV radiation is relatively strong and nighttime when UV~~  
795 ~~radiation is approximately 0 are shown in Fig.10. It is found that the correlation is better with a~~  
796 ~~clearer tendency and O<sub>3</sub> are higher during daytime, suggesting strong photochemistry progresses~~

797 ~~during daytime. Some data in the nighttime plots show relatively high O<sub>3</sub>. Most occurred in~~  
798 ~~September and February when O<sub>3</sub> concentrations were extremely high. It is also found that some~~  
799 ~~show relatively high NO<sub>x</sub> associated with relatively low PM<sub>2.5</sub>. After a further backward trajectories~~  
800 ~~analysis (Section 3.4), we found that these data are most likely corresponded to air masses coming~~  
801 ~~from the nearby and northwest in November and December, which may contain high NO<sub>x</sub> plumes~~  
802 ~~and transport to Nanjing during nighttime.~~

### 803 3.4 Backward Trajectories Analysis

804 The cluster means of the backward ~~trajectories~~ trajectory at 100 m from Gulou, Nanjing, in 2016  
805 fall (Fig. 11) and winter (Fig. 13) suggest different air flows ~~that were~~ transported to Nanjing from  
806 long distances. In general, the aerosol kinds and optical properties are characterized differently with  
807 different air masses in the two seasons, which are further analyzed by their origins in SON and DJF  
808 (Figs. 12 and 14). Figs. 12 and 14 show the main concentrations of particles and trace gases, the ratio  
809 of PM<sub>2.5</sub> to PM<sub>10</sub>, as well as the values of the aerosol optical properties of different clusters during  
810 SON and DJF, respectively. Because PM<sub>10</sub> varies similarly to PM<sub>2.5</sub>, while NO<sub>x</sub> varies similarly  
811 to NO<sub>y</sub>, we only show the variations of PM<sub>2.5</sub> and NO<sub>y</sub> with cluster with cluster here. Also, because  
812  $\sigma_a$ ,  $\sigma_{ts}$  and  $\sigma_{bs}$  AAC, SC and Bsp have good correlations with particle concentrations (Zhuang  
813 et al., 2014a) and  $g_{A_{sp}}$  is greatly affected by relative humidity (RH), we discuss the variation of  
814  $\alpha_{ts}$  and  $\omega_0$  SAE and SSA with cluster here.

815 ~~Most of air masses came from the oceans in fall (40 %, cluster 4 in Fig. 11) and from the north and~~  
816 ~~north-west of China in winter (49 %, clusters 1 and 4 in Fig. 13). Although air masses came from~~  
817 ~~north in both fall (cluster 4) and winter (cluster 4), the trajectory cluster in fall came from the oceans~~

818 ~~more than the one in winter. In winter, considerable air masses arriving at the site were also from~~  
819 ~~places near Nanjing (35%, cluster 2 in Fig. 13). Therefore, the aerosol kinds and optical properties~~  
820 ~~at the study site are characterized differently with different air masses in the two seasons, which are~~  
821 ~~further analyzed by their origins in SON and DJF (Figs.12 and 14).-~~

822  
823 ~~Figs. 12 and 14 show the main concentrations of particles and trace gases, the ratio of  $PM_{2.5}$  to  $PM_{10}$ ,~~  
824 ~~as well as the values of the aerosol optical properties of different clusters during SON and DJF,~~  
825 ~~respectively. Because  $PM_{10}$  vary similarly to  $PM_{2.5}$ , while  $NO_x$  varies similarly to  $NO_y$ , we only~~  
826 ~~show the variations of  $PM_{2.5}$  and  $NO_y$  with cluster here. Also, because AAC, SC and Bsp have good~~  
827 ~~correlations with particle concentrations (Zhuang et al., 2014) and Asp is greatly affected by relative~~  
828 ~~humidity (RH), we discuss the variation of SAE and SSA with cluster here.~~

829

830 In SON, the dominant air masses are from the East China Sea (passing through urban agglomeration  
831 regions (cluster 3), and less-developed regions (cluster 2) of the YRD, and from northern continent  
832 away from Nanjing (~~cluster 4~~) (passing through oceans and urban agglomeration regions (cluster  
833 4)). It is found that although air masses in cluster 3, cluster 4 and cluster 2 all pass through the  
834 oceans and have the same level of relative humidity (RH), differences still exist among the clusters.  
835 The air masses have to cross the urban agglomeration (from Shanghai to Nanjing) of YRD when  
836 they arrive inbefore arriving in Nanjing in cluster 3 but past-pass less-developed regions (north  
837 Jiangsu Province) in cluster 4 and cluster 2. In YRD, emissions of the aerosols and trace gases are  
838 much stronger in urban agglomeration regions than those in other areas (Zhang et al., 2009; Zhuang  
839 et al., 2013). It is also noticeable that concentrations of aerosols in cluster 4 are mostly lower, which

840 may result from its avoidance from BTH regions, also a megacities and urban agglomeration. In  
841 addition, air masses from the west of cluster 1 contain the highest ~~concentrations levels~~ of ~~particulate~~  
842 ~~matter~~ ~~PMs and precursors, CO and NO<sub>y</sub>~~, which ~~Air masses may result from crossing pass~~ central  
843 China with high emissions of ~~CO particles and precursors~~ according to ~~MERRA data~~  
844 (~~<https://gmao.gsfc.nasa.gov/reanalysis/MERRA>~~). ~~Particulate matter and NO<sub>y</sub> mainly have the same~~  
845 ~~sources as CO~~, according to MERRA data (~~<https://gmao.gsfc.nasa.gov/reanalysis/MERRA>~~) and  
846 ~~Zhuang et al. (2018)~~; and ~~h~~Also, high concentrations of these aerosols are also reflected in a high  
847 AOD according to the MISR data (~~<https://giovanni.gsfc.nasa.gov/giovanni>~~). ~~Zhuang et al. (2015)~~  
848 ~~also suggested that high emission occurred in central China. As for the ratio of PM<sub>2.5</sub> to PM<sub>10</sub>, the~~  
849 ~~ratio represents the amount number of particles deriving from secondary pollution progress~~  
850 ~~compared to those from primary pollution progress to some extent. In SON, ratios of clusters 1~3~~  
851 ~~are relatively close (all over 60%) with a maximum of cluster 3. Clusters 1-3 had relatively similar~~  
852 ~~ratios in SON, all over 60% except cluster 4, with the maximum of cluster 3, which means particles~~  
853 ~~deriving~~ ~~generating~~ from secondary pollution progress in the three clusters have a similar rate. O<sub>3</sub>  
854 concentrations among the ~~four~~ 4 cluster were different. Despite negative correlations of O<sub>3</sub> with its  
855 precursors and particles, the concentrations of O<sub>3</sub> in cluster 3 was higher than in cluster 4, ~~possibly~~  
856 ~~because radiation in cluster 3 is stronger~~ as UV in cluster 3 was higher than in cluster 4. The size of  
857 the aerosols in cluster 1 were finest ( ~~$\alpha_{ts}$  SAE is the largest in Fig. 12g~~), because the other three  
858 ~~clusters all passed through oceans before arriving Nanjing, are more humid going through~~  
859 ~~oceans~~ with higher relative humidity (RH), making it easier for particles' hygroscopic growth.  ~~$\omega_0$~~   
860 ~~SSA is also the largest in cluster 1, which means aerosols in cluster 1 are more scattering.~~  
861 (~~<https://giovanni.gsfc.nasa.gov/giovanni>~~). ~~Zhuang et al. (2015)~~ also suggested that high emission

862 occurred in central China. As for the ratio of  $PM_{2.5}$  to  $PM_{10}$ , the ratio represents the amount of  
863 particles deriving from secondary pollution progress compared to those from primary pollution  
864 progress. Clusters 1-3 had relatively similar ratios in SON, all over 60% except cluster 4, with the  
865 maximum of cluster 3, which means particles deriving from secondary pollution progress in the  
866 three clusters have a similar rate.  $O_3$  concentrations among the four cluster were different. Despite  
867 negative correlations of  $O_3$  with its precursors and particles, the concentrations of  $O_3$  in cluster 3  
868 was higher than in cluster 4, as UV in cluster 3 was higher than in cluster 4. The size of the aerosols  
869 in cluster 1 were finest (SAE is the largest in Fig. 12g), because the other three clusters all passed  
870 through oceans before arriving Nanjing, with higher relative humidity (RH), making it easier for  
871 particles' hygroscopic growth. SSA is also the largest in cluster 1, which means aerosols in cluster  
872 1 are more scattering.

873

874 In DJF, the air masses come from the local region were from the places near Nanjing (cluster 2),  
875 north-west areas/northern continent away from Nanjing (cluster 1), and northern regions/northern  
876 continent away far from Nanjing passing through oceans and urban agglomeration regions (cluster  
877 4). Air masses from cluster 1 and cluster 2 both account for over 30% of the total aerosol  
878 characteristics and are more polluted with relatively high levels of particles, CO, and  $NO_x$ . Air  
879 masses in cluster 1 come from Shandong Province while those in cluster 2 come from local areas.  
880 Particles and trace gases concentrations of cluster 2 are higher than those of cluster 1 to some extent,  
881 implying the severer air pollution problem in YRD region. This is different from that in SON.  
882 Therefore, besides what has been discussed of cluster 3 and cluster 4 in SON, it is found that air  
883 masses from cluster 1 and cluster 2 both account for over 30% of the total characteristics of the



884 aerosol optical properties and are main sources of pollutants in DJF (particles, CO, and NO<sub>x</sub> are  
885 higher in Fig.14). Air masses in cluster 1 came from Shandong Province while those in cluster 2  
886 came from areas nearby. Particles and trace gases concentrations of cluster 2 are higher than those  
887 of cluster 1 to some extent, which may result from the severer pollution in southern YRD than in  
888 Shandong Province. The concentrations of O<sub>3</sub>, similar to that in SON, is affected by radiation  
889 besides precursors levels. Thus, O<sub>3</sub> concentration in cluster 2 is a little higher than that in cluster 1.  
890 was affected by the UV (O<sub>3</sub> concentrations in cluster 2 is a little higher than that in cluster 1 in  
891 Fig.14). The ratios of PM<sub>2.5</sub> to PM<sub>10</sub> of cluster 1 and cluster 2 are approximately equal in DJF, over  
892 70%. The size of aerosols in cluster 1 and 2 are coarser, however, probably due to the higher RH  
893 (over 65%) finer without passing through oceans, so SAE are larger (Fig.12g). Aerosols in cluster  
894 1 are scatter to some extent compared to those in cluster 2. The trajectories of cluster 3 and cluster  
895 4 are analogous to those in SON, respectively, but more polluted, probably due to more emissions  
896 in DJF especially in north China and weaker flow from ocean in DJF.

897

898

### 899 3.5 Case Study

900 For further understanding of the causes for high pollutants episodes, especially high particulate and  
901 O<sub>3</sub> episodes, detailed analysis of a typical episode from 2016 December 3-6 is presented in this  
902 section. we choose a typical episode from 2016 December 3-6 for a detailed analysis.

903

904 Fig.15 (a) and (b) show that high O<sub>3</sub> concentrations (over 80 ppb) occurred on December 4 with

905 broad O<sub>3</sub> peaks (over 60 ppb) in the following days, while the average O<sub>3</sub> during the cold seasons  
906 was 37.7 ppb. Though there is a lack of particulate matter concentrations because of the instrument  
907 breakdown, ~~we could see the~~ high concentrations of ~~particulate matter~~PMs might possibly occur  
908 ~~referring to from~~ the relatively high  $\sigma_e$  ~~EC~~ value (over 500 Mm<sup>-1</sup>) and BC concentrations (over 6  
909 μg/m<sup>3</sup>) on December 4th, ~~and b~~Both PMs reach a maximum on December 5th (PM<sub>2.5</sub> over 200  
910 μg/m<sup>3</sup> and PM<sub>10</sub> over 300 μg/m<sup>3</sup>), over 3 times of the average concentrations. Besides, NO<sub>x</sub>, NO<sub>y</sub>,  
911 have reached high levels since December 4th (NO<sub>x</sub> over 70 ppb and NO<sub>y</sub> over 100 ppb). It is also  
912 noticeable that  $\omega_0$  SSA has a relatively sharp decrease from December 4th, especially on December  
913 5th when particle concentrations were extremely high, ~~representing probably suggesting~~ that the  
914 ratio of PM<sub>10</sub> became higher. Meanwhile, a relatively sharp increase occurred in  $\alpha_{ts}$  ~~SAE~~, without  
915 any obvious variation in  $\alpha_a$  ~~AAE~~, though, ~~which shows~~implying that scattering aerosols could take  
916 the leading role during this episode.~~are the main components.~~ It is also found that this case occurred  
917 under calm conditions before the passage of a cold front, which was ~~at in~~ the front of a continental  
918 high pressure system originating from Mongolia and sweeping over Nanjing (Fig.15 (c)), ~~)). and~~  
919 And the decrease in temperature with high pressure system dominating eastern China ~~were wes~~ also  
920 detected on December 6th. Backward ~~trajectories trajectory~~ analysis for the past 96 hours (Fig.15  
921 (d)) ~~were was~~ conducted ~~for from~~ December 5th at 8 pm 20:00 LT, ~~for including~~ the maximum  
922 concentrations of O<sub>3</sub> on December 4th and ~~particulate matter~~PMs on December 5th, ~~which It is~~  
923 suggested that predominant wind was just in time from the NW directions. Therefore, air masses  
924 with high particles and O<sub>3</sub> concentrations would be transported to Nanjing, ~~which were~~It was also  
925 clearly detected in Nanjing during these days, such as the relatively high O<sub>3</sub> during nighttime on  
926 December 5th and 6th. The highest O<sub>3</sub> concentration on December 4th together with high particles

927 and primary pollutants  $\text{NO}_x$  and  $\text{NO}_y$  suggests a strong in situ photochemical production in mixed  
928 regional plumes under the influence of ~~high-the high-~~high-pressure system. Previous studies (Luo et al.,  
929 2000; Wang et al., 2006; Ding et al., 2013b) Guo et al. (2009) reported that the anticyclonic  
930 conditions, e.g., sunny weather and low wind velocities, are favorable for pollution accumulation  
931 and  $\text{O}_3$  production. Results in this case clearly demonstrate sub-regional transport of primary and  
932 secondary air pollutants within the YRD region under such weather system.

#### 933 4. Conclusion

934  
935 In this study, particles (BC and PMs) and trace gases ( $\text{O}_3$  and related precursors) in polluted seasons,  
936 are investigated based on continuous measurements of concentrations and optical properties in the  
937 urban area of Nanjing. The characteristics and underlying reasons are comprehensively discussed  
938 from perspectives of temporal variations, inter-species correlations, trajectories analysis, and case  
939 studies associated with weather data and Lagrangian dispersion modeling.

940 ~~In this paper, an overview of particles and  $\text{O}_3$  concentrations, together with trace gases, during 2016~~  
941 ~~the cold seasons in urban Nanjing, China, has been presented based on continuous measurements~~  
942 ~~of aerosols concentrations and optical properties at the Gulou site. The particles,  $\text{O}_3$  and trace gases~~  
943 ~~concentrations are comprehensively characterized from perspectives of temporal variations, inter-~~  
944 ~~species correlations, trajectories analysis, and case studies based on weather data and Lagrangian~~  
945 ~~dispersion modeling.~~

946

947 Measurements show that average concentrations of  $\text{PM}_{10}$  was  $86.3 \mu\text{g}/\text{m}^3$ , with BC and  $\text{PM}_{2.5}$

948 accounting for 3% and 67%, respectively. 48 and 14 days of PM<sub>2.5</sub> and PM<sub>10</sub> exceeded NAAQS-CN,  
949 respectively. The results suggested that both BC and PMs levels in Nanjing have decreased because  
950 of energy conservation since 2014. The average concentration of O<sub>3</sub> was 37.7 ppb with 40 days of  
951 exceedance. Precursor concentrations, including CO, NO<sub>x</sub> and NO<sub>y</sub>, averaged 753, 28.4, and 28.6  
952 ppb, respectively. Contrast to particles, O<sub>3</sub> concentration has increased in urban Nanjing, implying  
953 a severer pollution in rural area and entire YRD region. All the aerosols have substantially monthly  
954 and diurnal variations. Both particles and precursors reached maximum values in December and  
955 minimum values in October due to higher emission and less precipitation. O<sub>3</sub> showed a peak in  
956 September because of stronger radiation. Diurnal variations of BC and PMs were similar with peaks  
957 around 7:00~9:00 and 22:00~0:00 LT. Both of the peaks were influenced by traffic emissions in  
958 rush hours and accumulation of air pollution especially at night-time. The peaks of PMs often  
959 occurred 1~ 2 h later than those of BC, possibly due to the production of secondary particles.  
960 Precursors and particles varied similarly in time, and the diurnal variation of O<sub>3</sub> was analogous to  
961 that of radiation with peak around 15:00 LT.

962 ~~Measurements show that hourly mean particle concentrations, including BC, PM<sub>2.5</sub>, and PM<sub>10</sub> at~~  
963 ~~Gulou site, Nanjing, China, are  $2.602 \pm 1.720 \mu\text{g}/\text{m}^3$ ,  $58.2 \pm 36.8 \mu\text{g}/\text{m}^3$ , and  $86.3 \pm 50.8 \mu\text{g}/\text{m}^3$ ,~~  
964 ~~respectively, with ranges of  $0.064\text{--}15.608 \mu\text{g}/\text{m}^3$ ,  $0.8\text{--}256.2 \mu\text{g}/\text{m}^3$ , and  $1.1\text{--}343.4 \mu\text{g}/\text{m}^3$ ,~~  
965 ~~respectively. During the six months, 48 and 14 days when PM<sub>2.5</sub> and PM<sub>10</sub>, respectively, exceeded~~  
966 ~~Class II NAAQS. Measurements also showed that hourly mean O<sub>3</sub> concentrations in urban Nanjing~~  
967 ~~ranged from 0.2 to 235.7 ppb, with average concentrations of  $37.7 \pm 33.5$  ppb. There were 40 days~~  
968 ~~excess of O<sub>3</sub> during the period, suggesting a severe air pollution problem in the region.~~

970 PM<sub>2.5</sub> has a quasi-power-law distribution with Vis under RH of different ranges. The correlation is  
971 stronger than that in a rural region in YRD, implying greater effects of air pollution on visibility in  
972 urban Nanjing. O<sub>3</sub> shows an anti-correlation with NO<sub>x</sub> generally, but it tends to be positive with a  
973 relatively high temperature and low level of NO<sub>x</sub>. PM<sub>2.5</sub> and BC are overall negatively correlated  
974 with O<sub>3</sub>. A positive correlation between PM<sub>2.5</sub> and O<sub>3</sub> exists under high temperatures, while it is not  
975 found in BC-O<sub>3</sub> correlation. The negative correlation is related to the titration effect of high NO  
976 concentration, which is highly correlated with particles due to similar emission sources. And the  
977 negative correlation between PM<sub>2.5</sub> and UV suggests particles could decrease actinic flux of  
978 radiation, and thus inhibit the photolysis reactions near surface to degrees. The positive correlation  
979 implies the formation of secondary aerosols under the effects of the high concentrations of oxidants  
980 and solar radiation. BC is hard to be generated through chemical reactions, which might explain  
981 why the correlation between BC and O<sub>3</sub> is obscurer when temperature rises. An increase in CO, as  
982 well as PM<sub>2.5</sub> and BC, always results in higher O<sub>3</sub> concentration, while NO<sub>x</sub> reverses, which  
983 indicates a VOC-sensitive regime for photochemical production of O<sub>3</sub> in urban Nanjing.

984

985 ~~The correlation analysis shows a negative PM<sub>2.5</sub>-Vis correlation as well as RH, both of which would~~  
986 ~~promote the extinction coefficient. Negative O<sub>3</sub>-NO<sub>y</sub> correlation occurs when temperature is~~  
987 ~~relatively low but the correlation becomes weaker when temperature becomes higher. PM<sub>2.5</sub>-O<sub>3</sub>-T~~  
988 ~~correlations reveal the formation of secondary aerosols, especially fine particulate matter under high~~  
989 ~~O<sub>3</sub> concentration and temperature conditions, while BC-O<sub>3</sub>-T correlations not. CO-NO<sub>y</sub>-O<sub>3</sub> and~~  
990 ~~PM<sub>2.5</sub>-NO<sub>y</sub>-O<sub>3</sub> correlations suggest that a VOC-sensitive regime for photochemical production of~~  
991 ~~O<sub>3</sub> in urban Nanjing.~~

992

993 Backward trajectories indicate that Nanjing could be affected by local air flow (35% in DJF) and  
994 long-distance air flows mostly from western (11% in SON), northwestern (31% in DJF), northern  
995 (up to 50 % in SON and DJF), eastern (40% in SON and 17% in DJF). Considerable air pollution  
996 in the urban area of Nanjing is due to local and sub-regional emissions. Basically, air masses from  
997 the oceans and remote or less-developed areas are relatively clean with low aerosols concentrations.  
998  $\alpha_{ts}$  at the site is usually low when the relative humidity of air masses is high, possibly suggesting  
999 the increased hygroscopicity and more secondary aerosols production under higher RH.

1000 ~~The backward trajectory analysis suggests that the prevailing winds in Nanjing were from the north~~  
1001 ~~and east during the cold seasons in 2016. Air masses that are either from the east without passing~~  
1002 ~~through the urban agglomeration and from northern without crossing BTH regions were clean with~~  
1003 ~~low pollution concentrations. In contrast, air masses from local regions were polluted in winter,~~  
1004 ~~suggesting a severe air quality problem in YRD region. SAE and SSA were further studied,~~  
1005 ~~indicating that particles from oceans were coarser and less scattering because the airmasses were~~  
1006 ~~under high RH condition and less secondary pollutants were produced.~~

1007

1008 A case study for a typical high O<sub>3</sub> and PM<sub>2.5</sub> episode in December 2016 illustrates the important  
1009 influences of sub-regional transport of pollutants from strong source regions and local synoptic  
1010 weather on the episode. Stable conditions such as an anticyclonic system make it easy for pollutants  
1011 to accumulate in this region. Results from this case reveal the mechanisms of sub-regional transport  
1012 of primary and secondary air pollutants within the YRD region.

1013

1014 Overall, this work highlights the interactions and mechanisms of various aerosols and metrological  
1015 fields besides the important environmental impact from human activities and meteorological  
1016 conditions in the urban area in YRD region. Considering both results in this study and previous  
1017 work, it is suggested that collaborative control measures among different administrative regions are  
1018 urgently needed including but not limited to energy conservation and reduction of pollution  
1019 emissions to improve air quality in the western part of YRD region.

1020

1021 Data availability. The automobile numbers and GDP are from <http://www.njti.gov.cn/>. Satellite CO  
1022 data are available at: <https://gmao.gsfc.nasa.gov/reanalysis/MERRA>. The aerosols AOD data are  
1023 available at: <https://giovanni.gsfc.nasa.gov/giovanni>. The Lagrangian dispersion model Hybrid  
1024 Single-Particle Lagrangian Integrated Trajectory (HYSPLIT) was supplied by NOAA:  
1025 [http://ready.arl.noaa.gov/HYSPLIT\\_traj.php](http://ready.arl.noaa.gov/HYSPLIT_traj.php). The meteorological data for HYSPLIT are accessible  
1026 from <ftp://arlftp.arlhq.noaa.gov/pub/archives/gdas1>.

1027

1028 **Acknowledgements:** This work was supported by the National Key R&D Program of China  
1029 (2017YFC0209803, 2014CB441203, 2016YFC0203303), the National Natural Science  
1030 Foundation of China (41675143, 91544230, 41621005). The authors would like to thank all  
1031 members in the AERC of Nanjing University for maintaining instruments.

1032

1033 **References:**

1034 Allen, R. J., Sherwood, S. C., Norris, J. R., and Zender, C.S.: Recent Northern Hemisphere tropical  
1035 expansion primarily driven by black carbon and tropospheric ozone, Nature, 485,

1036 doi:10.1038/nature11097, 350–353, 2012.

1037 Anderson, T. L. and Ogren, J. A.: Determining aerosol radiative properties using the TSI 3563  
1038 integrating nephelometer, *Aerosol Sci. Tech.*, 29, 57–69, 1998.

1039 An, J., Zou, J., Wang, J., Lin, X., Zhu, B., 2015. Differences in ozone photochemical characteristics  
1040 between the megacity Nanjing and its suburban surroundings, Yangtze River Delta, China.  
1041 *Environ. Sci. Pollut. Res.* 22, 19607–19617.

1042 ~~Andrews, E., Sheridan, P. J., Fiebig, M., McComiskey, M., Ogren, J. A., Arnott, P., Covert, D.,~~  
1043 ~~Elleman, R., Gasparini, R., Collins, D., Jonsson, H., Schmid, B., and Wang, J.: Comparison of~~  
1044 ~~methods for deriving aerosol asymmetry parameter, *J. Geophys. Res.*, 111, D05S04,~~  
1045 ~~doi:10.1029/2004JD005734, 2006.~~

1046 Arnott, W. P., Hamasha, K., Moosmuller, H., Sheridan, P. J., and Ogren, J. A.: Towards aerosol  
1047 light-absorption measurements with a 7-wavelength aethalometer: evaluation with a  
1048 photoacoustic instrument and 3-wavelength nephelometer, *Aerosol Sci. Technol.*, 39, 17–29,  
1049 doi:10.1080/027868290901972, 2005.

1050 Atkinson, R.: Atmospheric chemistry of VOCs and NO<sub>x</sub>, *Atmos. Environ.*, 34, 2063–2101,  
1051 doi:10.1016/S1352-2310(99)00460-4, 2000.

1052 Badarinath, K. V. S., Kharol, S. K., Chand, T. R. K., Parvathi, Y. G., Anasuya, T., and Jyothsna, A.  
1053 N.: Variations in black carbon aerosol, carbon monoxide and ozone over an urban area of  
1054 Hyderabad, India, during the forest fire season, *Atmos. Res.*, 85(1), 18–26, 2007.

1055 Baker, A. K., Beyersdorf, A. J., Doezema, L. A., Katzenstein, A., Meinardi, S., Simpson, I. J., Blake,  
1056 D. R., Rowland, F. S.: Measurements of nonmethane hydrocarbons in 28 United States cities,  
1057 *Atmos. Environ.*, 2008, 42(1): 170–182.

1058 ~~Bond, T. C., Doherty, S. J., Fahey, D. W., Forster, P. M., Berntsen, T., DeAngelo, B. J., Flanner, M.~~



1059 ~~G., Ghan, S., Karcher, B., Koch, D., Kinne, S., Kondo, Y., Quinn, P. K., Sarofim, M. C.,~~  
1060 ~~Schultz, M. G., Schulz, M., Venkataraman, C., Zhang, H., Zhang, S., Bellouin, N., Guttikunda,~~  
1061 ~~S. K., Hopke, P. K., Jacobson, M. Z., Kaiser, J. W., Klimont, Z., Lohmann, U., Schwarz, J. P.,~~  
1062 ~~Shindell, D., Storz, T., Warren, S. G., and Zender, C. S.: Bounding the role of black carbon~~  
1063 ~~in the climate system: A scientific assessment, J. Geophys. Res.: Atmos., 118, 5380–5552,~~  
1064 ~~doi:10.1002/jgrd.50171, 2013.~~

1065 ~~Bond, T. C., Streets, D. G., Yarber, K. F., Nelson, S. M., Woo, J. H., and Klimont, Z.: A technology-~~  
1066 ~~based global inventory of black and organic carbon emissions from combustion, J. Geophys.~~  
1067 ~~Res., 109(D14), D14203, doi:10.1029/2003jd003697, 2004.~~

1068 ~~Castro, T., Madronich, S., Rivale, S., Muhlia, A., and Mar, B.: The influence of aerosols on~~  
1069 ~~photochemical smog in Mexico City, Atmos. Environ., 35, 1765–1772, 2001.~~

1070 ~~Chameides, W.L., Bergin, M., 2002. Soot takes center stage. Science 297 (5590), 2214–2215.~~

1071 ~~Chameides, W. L., Li, X., Tang, X., Zhou, X., Luo, C., Kiang, C. S., John, J. St., Saylor, R. D., Liu,~~  
1072 ~~S. C., Lam, K. S., Wang, T., and Giorgi, F.: Is ozone pollution affecting crop yields in China,~~  
1073 ~~Geophys. Res. Lett., 26, 867–870, 1999b.~~

1074 ~~Chameides, W. L., Yu, H., Liu, S. C., Bergin, M., Zhou, X., Mearns, L., Wang, G., Kiang, C. S.,~~  
1075 ~~Saylor, R. D., Luo, C., Huang, Y., Steiner, A., and Giorgi, F.: Case study of the effects of~~  
1076 ~~atmospheric aerosols and regional haze on agriculture: An opportunity to enhance crop yields in~~  
1077 ~~China through emission controls?, PNAS, 96, 13626–13633, 1999a.~~

1078 ~~Chen, T.; He, J.; Lu, X.W.; She, J.F.; Guan, Z.Q. Spatial and Temporal Variations of PM2.5 and Its~~  
1079 ~~Relation to Meteorological Factors in the Urban Area of Nanjing, China. Int. J. Environ. Res.~~  
1080 ~~Public Health 2016, 13, 921.~~

1081 [Cheung, V.T.F., Wang, T., 2001. Observational study of ozone pollution at a rural site in the Yangtze](#)  
1082 [Delta of China. Atmos. Environ. 35, 4947–4958.](#)

1083 [Chow, J. C., Watson, J. G., Lowenthal, D. H., Chen, L.-W. A., Motallebi, N.: PM2.5 source profiles](#)  
1084 [for black and organic carbon emission inventories. Atmospheric Environment, 2011, 45\(31\):](#)  
1085 [5407-5414.](#)

1086 [Collaud Coen, M., Weingartner, E., Apituley, A., Ceburnis, D., Fierz-Schmidhauser, R., Flentje, H.,](#)  
1087 [Henzing, J. S., Jennings, S. G., Moerman, M., Petzold, A., Schmid, O., and Baltensperger, U.:](#)  
1088 [Minimizing light absorption measurement artifacts of the Aethalometer: evaluation of five](#)  
1089 [correction algorithms, Atmos. Meas. Tech., 3, 457–474, doi:10.5194/amt-3-457-2010, 2010.](#)

1090 [Deng, J.J., Wang, T.J., Liu, L., Jiang, F.: Modeling heterogeneous chemical processes on aerosol](#)  
1091 [surface. Particuology 8 \(4\), 308-318, 2010.](#)

1092 [Deng, J., Wang, T., Jiang, Z., Xie, M., Zhang, R., Huang, X., Zhu, J., 2011. Characterization of](#)  
1093 [visibility and its affecting factors over Nanjing, China. Atmospheric Research 101, 681-691.](#)

1094 [Chan, C.K., Yao, X., 2008. Air pollution in mega-cities in China. Atmos. Environ. 42, 1–42.](#)

1095 ~~[Collaud Coen, M., Weingartner, E., Apituley, A., Ceburnis, D., Fierz-Schmidhauser, R., Flentje, H.,](#)~~  
1096 ~~[Henzing, J. S., Jennings, S. G., Moerman, M., Petzold, A., Schmid, O., and Baltensperger, U.:](#)~~  
1097 ~~[Minimizing light absorption measurement artifacts of the Aethalometer: evaluation of five](#)~~  
1098 ~~[correction algorithms, Atmos. Meas. Tech., 3, 457–474, doi:10.5194/amt-3-457-2010, 2010.](#)~~

1099 ~~[Crutzen P. 1973. A discussion of the chemistry of some minor constituents in the stratosphere and](#)~~  
1100 ~~[troposphere\[J\]. Pure Appl. Geophys., 106–108 \(1\): 1385–1399, doi: 10.1007/BF00881092.](#)~~

1101 ~~[Deng, J.J., Wang, T.J., Liu, L., Jiang, F.: Modeling heterogeneous chemical processes on aerosol](#)~~  
1102 ~~[surface. Particuology 8 \(4\), 308-318, 2010.](#)~~

1103 Derwent, R. G., Ryall, D. B., Jennings, S. G., Spain, T. G., and Simmonds, P. G.: Black carbon  
1104 aerosol and carbon monoxide in European regionally polluted air masses at Mace Head,

1105 Ireland during 1995–1998, *Atmos. Environ.*, 35(36), 6371–6378, 2001.

1106 Ding, A. J., Fu, C. B., Yang, X. Q., Sun, J. N., Zheng, L. F., Xie, Y. N., Herrmann, E., Nie, W.,  
1107 Petaja, T., Kerminen, V. -M., and Kulmala, M.: Ozone and fine particle in the western Yangtze  
1108 River Delta: an overview of 1 yr data at the SORPEs station, *Atmos. Chem. Phys.*, 13, 5813–  
1109 5830, 2013b.

1110 Draxler, R. R. and Hess, G. D.: An overview of the HYSPLIT 4 modeling system for trajectories  
1111 dispersion and deposition, *Aust. Meteor. Mag.*, 47, 295–308, 1998.

1112 Draxler, R.R. and Rolph, G.D. (2013) HYSPLIT (HYbrid Single-Particle Lagrangian Integrated  
1113 Trajectory) Model Access Via NOAA ARL READY Website, NOAA Air Resources  
1114 Laboratory, Silver Spring, MD [online].

1115 [Eichler, H., Cheng, Y. F., Birmili, W., Nowak, A., Wiedensohler, A., Brüggemann, E., Gnauk, T.,](#)  
1116 [Herrmann, H., Althausen, D., Ansmann, A., Engelmann, R., Tesche, M., Wendisch, M., Zhang, Y.](#)  
1117 [H., Hu, M., Liu, S., and Zeng, L. M.: Hygroscopic properties and extinction of aerosol particles at](#)  
1118 [ambient relative humidity in South-Eastern China, \*Atmos. Environ.\*, 42, 25, 6321–6334.](#)  
1119 [doi:10.1016/j.atmosenv.2008.05.007, 2008.](#)

1120 Gao, J., Wang, T., Ding, A., and Liu, C.: Observational study of ozone and carbon monoxide at the  
1121 summit of mount Tai (1534 m a.s.l.) in central-eastern China. *Atmos. Environ.* 39, 4779–4791,  
1122 2005.

1123 Geng, F.H., Tie, X.X., Xu, J.M., Zhou, G.Q., Peng, L., Gao, W., Tang, X., Zhao, C.S.:  
1124 Characterizations of ozone, NO<sub>x</sub>, and VOCs measured in Shanghai, China. *Atmos. Environ.*  
1125 42, 6873–6883, 2008.

1126 [Gong, W., Zhang, T.H., Zhu, Z.M., Ma, Y.Y, Ma, X., Wang, W.: Characteristics of PM<sub>1.0</sub>, PM<sub>2.5</sub>](#)

1127 [and PM10 and their relation to black carbon in Wuhan, central China. Atmosphere, 2015, 6\(9\):](#)  
1128 [1377-1387.](#)

1129 [Guo, H., Wang, T., Simpson, I., Blake, D., Yu, X., Kwok, Y., et al., 2004b. Source contributions to](#)  
1130 [ambient VOCs and CO at a rural site in eastern China. Atmos. Environ. 38, 4551–4560.](#)

1131 [Han, S., 2011. Analysis of the relationship between O3, NOandNO2 in Tianjin, China. Aerosol Air](#)  
1132 [Qual. Res.](#)

1133 [Huang, F., Li, X., Wang, C., Xu, Q., Wang, W., Luo, Y., Tao, L., Gao, Q., Guo, J., Chen, S.: PM2.5](#)  
1134 [spatiotemporal variations and the relationship with meteorological factors during 2013–2014 in](#)  
1135 [Beijing, China. PLoS ONE 2015, 10, e0141642.](#)

1136 [Huang, X., Li, M., Li, J., Song, Y.: A high-resolution emission inventory of crop burning in fields](#)  
1137 [in China based on MODIS Thermal Anomalies/Fire products. Atmospheric Environment, 2012,](#)  
1138 [50:9-15.](#)

1139 [Huang, X. X., Wang, T. J., Jiang, F., Liao, J. B., Cai, Y. F., Yin, C. Q., Zhu, J. L., Han, Y., 2013.](#)  
1140 [Studies on a severe dust storm in East Asia and its impact on the air quality of Nanjing, China.](#)  
1141 [Aerosol Air Qual. Res. 13, 179e193.](#)

1142 ~~[Jacobson, M.Z., 2002. Control of fossil-fuel particulate black carbon and organic matter, possibly](#)~~  
1143 ~~[the most effective method of slowing global warming. Journal of Geophysical Research 107](#)~~  
1144 ~~[\(D19\), 4410.](#)~~

1145 ~~[Jacobson, M. Z.: Studying the effects of aerosols on vertical photolysis rate coefficient and](#)~~  
1146 ~~[temperature profiles over an urban airshed, J. Geophys. Res., 103, 10593–10604,](#)~~  
1147 ~~[doi:10.1029/95JD00287, 1998.](#)~~

1148 [Jennings, S. G., Spain, T. G., Doddridge, B. G., Maring, H., Kelly, B. P., and Hansen, A. D. A.:](#)  
1149 [Concurrent measurements of black carbon aerosol and carbon monoxide at Mace Head, J.](#)  
1150 [Geophys. Res.-Atmos., 101\(D14\), 19447–19454, 1996.](#)

1151 [Jennings, S. G., Spain, T. G., Doddridge, B. G., Maring, H., Kelly, B. P., and Hansen, A. D. A.:](#)  
1152 [Concurrent measurements of black carbon aerosol and carbon monoxide at Mace Head, J.](#)

1153 [Geophys. Res. Atmos., 101\(D14\), 19447–19454, 1996.](#)

1154 [Jerrett, M., Finkelstein, M. M., Brook, J. R., Arain, M. A., Kanaroglou, P., Stieb, D. M., Gilbert, N.](#)

1155 [L., Verma, D., Finkelstein, N., Chapman, K. R., and Sears, M. R.: A Cohort Study of Traffic-](#)

1156 [Related Air Pollution and Mortality in Toronto, Ontario, Canada. Environmental Health](#)

1157 [Perspectives, 2009, 117\(5\):772-777.](#)

1158 Jiang, J., Zheng, Y.F., Liu, J.J., and Fan, J.J.: Observational research on planetary boundary layer

1159 by lidar over Nanjing city. Environ. Sci. Technol. 37, 22–27 (in Chinese), 2014.

1160 [Jiang, L., Zhang, Z. F., Zhu, B., Shen, Y., Wang, H. L., Shi, S. S., Sha, D. D.: Comparison of](#)

1161 [parameterizations for the atmospheric extinction coefficient in Lin'an, China. The Science of the](#)

1162 [total environment., 2018, 621. 507-515. 10.1016/j.scitotenv.2017.11.182.](#)

1163 Kaufman, Y.J.; Tanré, D.; Boucher, O. A satellite view of aerosols in the climate system. Nature

1164 2002, 419, 215–223.

1165 ~~[Kristjánsson, J.E., 2002. Studies of the aerosol indirect effect from sulfate and black carbon aerosols.](#)~~

1166 ~~[Journal of Geophysical Research 107 \(D15\), 4246.](#)~~

1167 Khoder, M. I.: Atmospheric conversion of sulfur dioxide to particulate sulfate and nitrogen dioxide

1168 to particulate nitrate and gaseous nitric acid in an urban area, Chemosphere, 49, 675–684, 2002.

1169 ~~[Kristjánsson, J.E., 2002. Studies of the aerosol indirect effect from sulfate and black carbon aerosols.](#)~~

1170 ~~[Journal of Geophysical Research 107 \(D15\), 4246.](#)~~

1171 [Kumar, R., Barth, M.C., Madronich, S., Naja, M., Carmichael, G.R., Pfister, G.G., Knote, C.,](#)

1172 [Brasseur, G.P., Ojha, N., Sarangi, T., 2014. Effects of dust aerosols on tropospheric chemistry](#)

1173 [during a typical pre-monsoon season dust storm in northern India. Atmos. Chem. Phys. 14,](#)

1174 [6813-6834.](#)

1175 ~~[Lal, S., Naja, M., and Subbaraya, B.H.: Seasonal variations in surface ozone and its precursors over](#)~~

1176 ~~an urban site in India. Atmos. Environ. 34, 2713–2724, 2000.~~

1177 ~~Lam, K.S., Wang, T.J., Chan, L.Y., Wang, T., and Harris, J.: Flow patterns influencing the seasonal~~  
1178 ~~behavior of surface ozone and carbon monoxide at a coastal site near Hong Kong. Atmos.~~  
1179 ~~Environ. 35, 3121–3135, 2001.~~

1180 Larson, S.M., and Cass, G.R.: Characteristics of summer midday low-visibility events in the Los  
1181 Angeles area. Environmental Science & Technology. 23-281, 1989.

1182 Liao, H., Seinfeld, J.H., 2005. Global impacts of gas-phase chemistry aerosol interactions on direct  
1183 radiative forcing by anthropogenic aerosols and ozone. Journal of Geophysical Research 110,  
1184 D18208.

1185 Li, G.H., Zhang, R.Y., and Fan, J.W.: Impacts of black carbon aerosol on photolysis and ozone. [J].  
1186 Journal of Geophysical Research. Vol. 110, D23206, doi:10.1029/2005JD005898, 2005.

1187 Li, J., Bo, Y., Xie, S.: Estimating emissions from crop residue open burning in China based on  
1188 statistics and MODIS fire products. Journal of Environmental Sciences, 2016, 44:158-167.

1189 Li, J., Wang, Z., Wang, X., Yamaji, K., Takigawa, M., Kanaya, Y., Pochanart, P., Liu, Y., Irie, H.,  
1190 Hu, B., Tanimoto, H., and Akimoto, H.: Impacts of aerosols on summertime tropospheric  
1191 photolysis frequencies and photochemistry over Central Eastern China, Atmos. Environ., 45,  
1192 1817–1829, doi:10.1016/j.atmosenv.2011.01.016, 2011.

1193 Li, M., Wang, T., Xie, M., Li, S., Zhuang, B., Chen, P.: Agricultural fire impacts on ozone  
1194 photochemistry over the Yangtze River Delta region, East China. Journal of Geophysical  
1195 Research: Atmospheres, 2018.

1196 Li, M., Wang, T., Xie, M., Li, S., Zhuang, B., Chen, P.: Impacts of aerosol-radiation feedback on  
1197 local air quality during a severe haze episode in Nanjing megacity, eastern China, Tellus B:  
1198 Chemical and Physical Meteorology, 2017, 69(1):1339548.

1199 Li, M., Zhang, Q., Kurokawa, J., Woo, J.-H., He, K. B., Lu, Z. F., Ohara, T., Song, Y., Streets, D.

1200 [G., Carmichael, G. R., Cheng, Y. F., Hong, C. P., Huo, H., Jiang, X. J., Kang, S., Liu, F., Su, H.,](#)  
1201 [Zheng, B.: MIX: a mosaic Asian anthropogenic emission inventory under the international](#)  
1202 [collaboration framework of the MICS-Asia and HTAP, Atmos. Chem. Phys., 2017, 17, 935–963.](#)  
1203 ~~[Lin, W., Xu, X., Ge, B., Zhang, X., 2009. Characteristics of gaseous pollutants at Gucheng, a rural](#)~~  
1204 ~~[site southwest of Beijing. J. Geophys. Res. Atmos. 114, D00G14.](#)~~  
1205 [Lin, W., Xu, X., Zhang, X., Tang, J., 2008. Contributions of pollutants from North China Plain to](#)  
1206 [surface ozone at the Shangdianzi GAW Station. Atmos. Chem. Phys. 8, 5889–5898.](#)  
1207 [Liu, P. F., Zhao, C. S., Gobel, T., Hallbauer, E., Nowak, A., Ran, L., Xu, W. Y., et al.: Hygroscopic](#)  
1208 [properties of aerosol particles at high relative humidity and their diurnal variations in the North](#)  
1209 [China Plain, Atmos. Chem. Phys., 3479–3494, doi:10.5194/acp-11-3479-2011, 2011.](#)  
1210 Luo, C., St. John, J. C., Zhou, X. J., Lam, K. S., Wang, T., and Chameides, W. L.: A nonurban  
1211 ozone air pollution episode over eastern China: Observation and model simulation, J. Geophys.  
1212 Res., 105, 1889–1908, 2000.  
1213 ~~[Ma, J.Z., Xu, X.B., Zhao, C.S., Yan, P., 2012. A review of atmospheric chemistry research in China:](#)~~  
1214 ~~[photochemical smog, haze pollution, and gas-aerosol interactions. Adv. Atmos. Sci. 29, 1006–](#)~~  
1215 ~~[1026.](#)~~  
1216 McGowan, H. and Clark, A.: Identification of dust transport pathways from Lake Eyre, Australia  
1217 using Hysplit, Atmos. Environ., 42, 6915–6925, 2008.  
1218 [Meng, Z.Y., Xu, X.B., Yan, P., Ding, G.A., Tang, J., Lin, W.L., et al., 2009. Characteristics of trace](#)  
1219 [gaseous pollutants at a regional background station in Northern China. Atmos. Chem. Phys. 9,](#)  
1220 [927–936.](#)  
1221 [Ministry of Environmental Protection of China \(MEP\), Ambient air quality standards \(GB 3095–](#)  
1222 [2012\), 12 pp., China Environmental Science Press, Beijing, 2012.](#)  
1223 Müller, T., Laborde, M., Kassell, G., and Wiedensohler, A.: Design and performance of a three-  
1224 wavelength LED-based total scatter and backscatter integrating nephelometer, Atmos. Meas.

1225 Tech., 4, 1291–1303, doi:10.5194/amt-4-1291-2011, 2011.

1226 ~~Monks, P.S., Archibald, A.T., Colette, A., Cooper, O., Coyle, M., Derwent, R., Fowler, D., Granier,~~  
1227 ~~C., Law, K.S., Mills, G.E., Stevenson, D. S., Tarasova, O., Thouret, V., von Schneidemesser,~~  
1228 ~~E., Sommariva, R., Wild, O., and Williams, M. L.: Tropospheric ozone and its precursors~~  
1229 ~~from the urban to the global scale from air quality to short lived climate forcer, Atmos. Chem.~~  
1230 ~~Phys., 15, 8889–8973, doi:10.5194/acp-15-8889-2015, 2015.~~

1231 ~~Tropospheric ozone and its precursors... (PDF Download Available). Available from:~~  
1232 ~~[https://www.researchgate.net/publication/278623484\\_Tropospheric\\_ozone\\_and\\_its\\_precursors\\_fr](https://www.researchgate.net/publication/278623484_Tropospheric_ozone_and_its_precursors_fr)~~  
1233 ~~[om\\_the\\_urban\\_to\\_the\\_global\\_scale\\_from\\_air\\_quality\\_to\\_short\\_lived\\_climate\\_forcer#pdf](https://www.researchgate.net/publication/278623484_Tropospheric_ozone_and_its_precursors_fr)~~  
1234 ~~[accessed Jun 24 2018].~~

1235 Novelli, P.C., Masari, K. A., Lang, P.M.: Distributions and recent changes of carbon monoxide  
1236 in the lower troposphere. Journal of Geophysical Research Atmospheres, 1998, 103(D15).

1237 Pan, X.L., Kanaya, Y., Wang, Z.F., Liu, Y., Pochanart, P., Akimoto, H., Sun, Y.L., Dong, H.B., Li,  
1238 J., Irie, H., Takigawa, M., 2011. Correlation of black carbon aerosol and carbon monoxide in  
1239 the high-altitude environment of Mt. Huang in Eastern China. Atmospheric Chemistry and  
1240 Physics 11, 9735-9747.

1241 Petzold, A., Kopp, C., and Niessner, R.: The dependence of the specific attenuation cross-section  
1242 on black carbon mass fraction and particle size, Atmos. Environ., 31, 661–672, 1997.

1243 Qian, L., Yan, Y., and Qian, J.M.: An Observational Study on Physical and Optical Properties of  
1244 Atmospheric Aerosol in Autumn in Nanjing [J]. Meteorological and Environmental Research  
1245 2014, 5(2): 24 – 30.

1246 Roberts, P. T., Friedlander, S. K.: Analysis of sulfur in deposited aerosol particles by vaporization  
1247 and flame photometric detection. Atmospheric Environment, 1976, 10(5), 403-408.



1248 [Sassen, K., 2002. Indirect climate forcing over the western US from Asian dust storms. \*Geophys.\*](#)  
1249 [Res. Lett. 29.](#)

1250 [Schleicher, N., Cen, K., Norra, S.: Daily variations of black carbon and element concentrations of](#)  
1251 [atmospheric particles in the Beijing megacity – Part 1: General temporal course and source](#)  
1252 [identification. \*Chemie der Erde - Geochemistry\*, 2013, 73\(1\):51-60.](#)

1253 Schmid, O., Artaxo, P., Arnott, W. P., Chand, D., Gatti, L. V., Frank, G. P., Hoffer, A., Schnaiter,  
1254 M., and Andreae, M. O.: Spectral light absorption by ambient aerosols influenced by biomass  
1255 burning in the Amazon Basin. I: Comparison and field calibration of absorption measurement  
1256 techniques, *Atmos. Chem. Phys.*, 6, 3443–3462, doi:10.5194/acp-6-3443-2006, 2006.

1257 [Shao, M., Tang, X., Zhang, Y., Li, W., 2006. City clusters in China: air and surface water pollution.](#)  
1258 [Front. Ecol. Environ. 4, 353–361.](#)

1259 [Shen, G. F., Yuan, S. Y., Xie, Y. N., Xia, S. J., Li, L., Yao, Y. K., Qiao, Y. Z., Zhang, J., Zhao, Q. Y.,](#)  
1260 [Ding, A. J.: Ambient levels and temporal variations of PM<sub>2.5</sub> and PM<sub>10</sub> at a residential site in](#)  
1261 [the mega-city, Nanjing, in the western Yangtze River Delta, China. \*J. Environ. Sci. Health Part A\*](#)  
1262 [2014, 49, 171–178.](#)

1263 [Shi, C., Wang, S., Liu, R., Zhou, R., Li, D., Wang, W., et al., 2015. A study of aerosol optical](#)  
1264 [properties during ozone pollution episodes in 2013 over Shanghai, China. \*Atmos. Res.\* 153, 235–](#)  
1265 [249.](#)

1266 ~~Schneidemesser, E., Sommariva, R., Wild, O., and Williams, M. L.: Tropospheric ozone and its~~  
1267 ~~precursors from the urban to the global scale from air quality to short lived climate forcer,~~  
1268 ~~*Atmos. Chem. Phys.*, 15, 8889–8973, doi:10.5194/acp-15-8889-2015, 2015.~~

1269 Song, W.; Jia, H.; Huang, J.; Zhang, Y. A satellite-based geographically weighted regression model  
1270 for regional PM<sub>2.5</sub> estimation over the Pearl River Delta region in China. *Remote Sens.*  
1271 *Environ.* 2014, 154, 1–7.

1272 Spackman, J. R., Schwarz, J. P., Gao, R. S., Watts, L. A., Thomson, D. S., Fahey, D. W., Holloway,

1273 J. S., de Gouw, J. A., Trainer, M., and Ryerson, T. B.: Empirical correlations between black  
1274 carbon aerosol and carbon monoxide in the lower and middle troposphere, *Geophys. Res. Lett.*,  
1275 35(19), L19816, doi:10.1029/2008GL035237, 2008.

1276 Stein, A. F., Draxler, R. R., Rolph, G. D., Stunder, B. J. B., Cohen, M. D., and Ngan, F.: NOAA'S  
1277 Hysplit Atmospheric Transport and Dispersion Modeling System, *Bull. Amer. Meteor. Soc.*,  
1278 96, 2059–2077. doi: <http://dx.doi.org/10.1175/BAMS-D-14-00110.1>, 2016.

1279 [Streets, D.G., Gupta, S., Waldhoff, S.T., Wang, M.Q., Bond, T.C., Bo, Y.Y., 2001. Black carbon](#)  
1280 [emissions in China. \*Atmospheric Environment\* 35, 4281-4296.](#)

1281 [Tegen, I., Schepanski, K.:The global distribution of mineral dust. \*IOP Conference Series: Earth and\*](#)  
1282 [\*Environmental Science\*, 2009, 7:012001.](#)

1283 Tu, J., Xia, Z. G., Wang, H. S., and Li, W. Q.: Temporal variations in surface ozone and its  
1284 precursors and meteorological effects at an urban site in China, *Atmos. Res.*, 85, 310–337, 2007.

1285 van Donkelaar, A., Martin, R. V., Brauer, M., Kahn, R., Levy, R., Verduzco, C., and Villeneuve, P.  
1286 J.: Global estimates of ambient fine particulate matter concentrations from satellite-based  
1287 aerosol optical depth: development and application, *Environ. Health Perspectives*, 118, 847–  
1288 855, 2010.

1289 [Verma, R.L., Sahu, L.K., Kondo, Y., Takegawa, N., Han, S., Jung, J.S., Kin, Y.J., Fan, S., Sugimoto,](#)  
1290 [N., Shammaa, M.H., Zhang, Y.H., Zhao, Y., 2010. Temporal variations of black carbon in](#)  
1291 [Guangzhou, China, in summer 2006. \*Atmospheric Chemistry and Physics\* 10, 6471-6485.](#)

1292 [Virkkula, A., Makela, T., Hillamo, R., Yli-Tuomi, T., Hirsikko, A., Hameri, K., and Koponen, I. K.:](#)  
1293 [A simple procedure for correcting loading effects of aethalometer data, \*J. Air Waste Manage.\*,](#)  
1294 [57, 1214–1222, doi:10.3155/1047-3289.57.10.1214, 2007.](#)

1295 [von Schneidmesser, E., Monks, P. S., and Plass-Duelmer, C.: Global comparison of VOC and CO](#)

1296 [observations in urban areas, Atmos. Environ., 2010, 44\(39\): 5053–5064.](#)

1297 Wang, G. H., Huang, L. M., Gao, S. X., Gao, S. T., and Wang, L.S.: Characterization of watersoluble

1298 species of PM10 and PM2.5 aerosols in urban area in Nanjing, China, Atmos. Environ.,

1299 36,1299–1307, 2002.

1300 [Wang, H. L., Zhuang, Y. H., Wang, Y., Sun, Y. L., Yuan, H., Zhuang, G. S., Hao, Z. P.: Long-term](#)

1301 [monitoring and source apportionment of PM 2.5/PM 10 in Beijing, China. Journal of](#)

1302 [Environmental Sciences, 2008, 20\(11\): 1323-1327.](#)

1303 [Wang, M., Shao, M., Chen, W., Yuan, B., Lu, S., Zhang, Q., Zeng, L., Wang, Q.: A temporally and](#)

1304 [spatially resolved validation of emission inventories by measurements of ambient volatile organic](#)

1305 [compounds in Beijing, China. Atmos. Chem. Phys., 2014, 14\(12\): 5871–5891.](#)

1306 Wang, M.Y., Cao, C.X., Li, G.S., and Singh, R.P.: Analysis of a severe prolonged regional haze

1307 episode in the Yangtze River Delta, China, Atmos. Environ., 102, 112-121, 2015.

1308 [Wang, P., Zhao, W.: Assessment of ambient volatile organic compounds \(VOCs\) near major roads](#)

1309 [in urban Nanjing, China\[J\]. Atmospheric Research, 2008, 89\(3\):0-297.](#)

1310 [Wang, T., Cheung, V.T.F., Anson, M., Li, Y.S., 2001a. Ozone and related gaseous pollutants in the](#)

1311 [boundary layer of eastern China: overview of the recent measurements at a rural site. Geophys.](#)

1312 [Res. Lett. 28, 2373–2376.](#)

1313 [Wang, T., Cheung, T., Li, Y., Yu, X., Blake, D., 2002. Emission characteristics of CO, NOx, SO2](#)

1314 [and indications of biomass burning observed at a rural site in eastern China. J. Geophys. Res.-](#)

1315 [Atmos. 107.](#)

1316 [Wang, T., Poon, C.N., Kwok, Y.H., Li, Y.S., 2003. Characterizing the temporal variability and](#)

1317 [emission patterns of pollution plumes in the Pearl River Delta of China. Atmos. Environ.37,](#)

1318 [3539–3550.](#)

1319 [Wang, T., Wong, C., Cheung, T., Blake, D., Arimoto, R., Baumann, K., et al., 2004. Relationships](#)

1320 [of trace gases and aerosols and the emission characteristics at Lin'an, a rural site in eastern China,](#)

1321 [during spring 2001. J. Geophys. Res.-Atmos. 109.](#)

1322 Wang, T., Xue, L. K., Brimblecombe, P., Lam, Y.F., Li, L., and Zhang, L.: Ozone pollution in China:  
1323 A review of concentrations, meteorological influences, chemical precursors, and effects.  
1324 Science of the Total Environment., 575, 1582–1596, 2017.

1325 ~~Wang, T.J., Lam, K.S., Xie, M., Wang, X.M., Carmichael, G., and Li, Y.S.: Integrated studies of a~~  
1326 ~~photochemical smog episode in Hong Kong and regional transport in the Pearl River Delta of~~  
1327 ~~China. Tellus Ser. B Chem. Phys. Meteorol. 58, 31–40, 2006.~~

1328 Wang, T. J., Zhuang, B. L., Li, S., Liu, J., Xie, M., Yin, C. Q., Zhang, Y., Yuan, C., Zhu, J. L., Ji,  
1329 L. Q., and Han, Y.: The interactions between anthropogenic aerosols and the East Asian  
1330 summer monsoon using RegCCMS. J. Geophys. Res. Atmos., 120,  
1331 doi:10.1002/2014JD022877, 2015.

1332 Wang, X., Li, J., Zhang, Y., Xie, S., Tang, X., 2009b. Ozone source attribution during a severe  
1333 photochemical smog episode in Beijing, China. Sci. China, Ser. B: Chem. 52, 1270–1280.

1334 Wang, Y.Q., Stein, A.F., Draxler, R.R., de la Rosa, J.D., and Zhang, X.Y.: Global sand and dust  
1335 storms in 2008: Observation and HYSPLIT model verification, Atmos. Environ., 45, 6368-  
1336 6381, 2011.

1337 Wang, Y., Ying, Q., Hu, J., Zhang, H.: Spatial and temporal variations of six criteria air pollutants  
1338 in 31 provincial capital cities in China during 2013–2014. Environment International, 2014,  
1339 73:413–422.

1340 Wang, Y., Wang, X., Kondo, Y., Kajino, M., Munger, J.W., Hao, J., 2011b. Black carbon and its  
1341 correlation with trace gases at a rural site in Beijing: top-down constraints from ambient  
1342 measurements on bottom-up emissions. Journal of Geophysical Research 116, D24304.

1343 Wang, Y., Zhuang, G. S., Zhang, X. Y., Huang, K., Xu, Chang, Tang, A. H., Chen, J. M., and An,  
1344 Z. S.: The ion chemistry, seasonal cycle, and sources of PM<sub>2.5</sub> and TSP aerosol in Shanghai,  
1345 Atmos. Environ., 40, 2935–2952, 2006.

- 1346 [Wang, Z., Li, J., Wang, X., Pochanart, P., Akimoto, H.: Modeling of Regional High Ozone Episode](#)  
1347 [Observed at Two Mountain Sites \(Mt. Tai and Huang\) in East China. Journal of Atmospheric](#)  
1348 [Chemistry, 2006, 55\(3\):253-272.](#)
- 1349 [Wang, Z., Li, Y., Chen, T., Zhang, D., Sun, F., Pan, L.: Spatial-temporal characteristics of PM2.5 in](#)  
1350 [Beijing in 2013. Acta Geogr. Sin. 2015, 70, 110–120.](#)
- 1351 Weingartner, E., Saathoff, H., Schnaiter, M., Streit, N., Bitnar, B., and Baltensperger, U.:  
1352 Absorption of light by soot particles: determination of the absorption coefficient by means of  
1353 aethalometers, J. Aerosol Sci., 34, 1445–1463, doi:10.1016/S0021- 8502(03)00359-8, 2003.
- 1354 [Wu, D., Liu, Q., Lian, Y., Bi, X., Li, F., Tan, H., Liao, B., Chen, H., Hazy weather formation and](#)  
1355 [visibility deterioration resulted from fine particulate \(PM2.5\) pollutions in Guangdong and](#)  
1356 [Hong Kong. J. Environ. Sci. Circumst. 2012, 32, 2660–2669.](#)
- 1357 [Wu, D., Wu, C., Liao, B., Chen, H., Wu, M., Li, F., Tan, H., Deng, T., Li, H., Jiang, D., and Yu, J.](#)  
1358 [Z.: Black carbon over the South China Sea and in various continental locations in South China,](#)  
1359 [Atmos. Chem. Phys., 13, 12257–12270, doi:10.5194/acp-13-12257-2013, 2013.](#)
- 1360 Wu, Y.; Guo, J.; Zhang, X.; Tian, X.; Zhang, J.; Wang, Y.; Duan, J.; Li, X. Synergy of satellite and  
1361 ground based observations in estimation of particulate matter in eastern China. Sci. Total  
1362 Environ. 2012, 433, 20–30.
- 1363 Xiao, Z., Bi, X., Feng, Y., Wang, Y., Zhou, J., Fu, X., Weng, Y., 2012. Source apportionment of  
1364 ambient PM10 and PM2.5 in urban area of Ningbo City. Res. Environ. Sci. (China) 5, 549–  
1365 555.
- 1366 [Xiao, Z. M., Zhang, Y. F., Hong, S. M., Bi, X. H., Jiao, L., Feng, Y. C., Wang, Y. Q.: Estimation of](#)  
1367 [the Main Factors Influencing Haze, Based on a Long-term Monitoring Campaign in Hangzhou,](#)  
1368 [China. Aerosol & Air Quality Research., 2011, 11, 873-882.](#)
- 1369 Xie, M., Zhu, K.G., Wang, T.J., Chen, P.L., Han, Y., Li, S., Zhuang, B.L., and Shu, L., Temporal

1370 characterization and regional contribution to O<sub>3</sub> and NO<sub>x</sub> at an urban and a suburban site in  
1371 Nanjing, China. *Science of the Total Environment*, 551–552, 533–545, 2016.

1372 Xue, L., Wang, T., Louie, P.K.K., Luk, C.W.Y., Blake, D.R., Xu, Z., 2014a. Increasing external  
1373 effects negate local efforts to control ozone air pollution: a case study of Hong Kong and  
1374 implications for other Chinese cities. *Environ. Sci. Technol.* 48, 10769–10775.

1375 Yang, S. J., He, H. P., Lu, S. L., Chen, D., Zhu, J. X.: Quantification of crop residue burning in the  
1376 field and its influence on ambient air quality in Suqian, China. *Atmospheric Environment*,  
1377 2008,42(9):1961-1969.

1378 Yan, S.; Cao, H.; Chen, Y.; Wu, C.; Hong, T.; Fan, H. Spatial and temporal characteristics of air  
1379 quality and air pollutants in 2013 in Beijing. *Environ. Sci. Pollut. Res.* 2016, 23, 1–12.

1380 Yin, S., Wang, X.F., Xiao, Y., Tani, H., Zhong, G.S., Sun, Z.Y.: Study on spatial distribution of crop  
1381 residue burning and PM<sub>2.5</sub> change in China. *Environmental Pollution*, 2016, 220(Pt A):204-221.

1382 Yang, Y., Liu, X., Qu, Y., Wang, J., An, J., Zhang, Y., Zhang, F.: Formation mechanism of  
1383 continuous extreme haze episodes in the megacity Beijing, China, in January 2013. *Atmos.*  
1384 *Res.* 155, 192–203, 2015.

1385 Yan, P., Tang, J., Huang, J., Mao, J. T., Zhou, X. J., Liu, Q., Wang, Z. F., and Zhou, H. G.: The  
1386 measurement of aerosol optical properties at a rural site in Northern China, *Atmos. Chem.*  
1387 *Phys.*, 8, 2229–2242, doi:10.5194/acp-8-2229-2008, 2008.

1388 Yi, R., Wang, Y.L., Zhang, Y.J., Shi, Y., Li, M.S., 2015. Pollution characteristics and influence  
1389 factors of ozone in Yangtze River Delta. *Acta Sci. Circumst.* 35, 2370–2377 (in Chinese).

1390 Yu, J., Wang, W., Zhou, J., Xu, D., Zhao, Q., He, L., 2015. Analysis of pollution characteristics and  
1391 sources of PM<sub>2.5</sub> in winter of Ningbo City. *Environ. Sci. Technol. (China)* 8, 150–155.

1392 Zhang, Q., Streets, D.G., Carmichael, G.R., He, K.B., Huo, H., Kannari, A., Klimont, Z., Park, I.S.,  
1393 Reddy, S., Fu, J.S., Chen, D., Duan, L., Lei, Y., Wang, L.T., Yao, Z.L., 2009. Asian emissions  
1394 in 2006 for the NASA INTEX-B mission. *Atmos. Chem. Phys.* 9, 5131–5153.

1395 [Zhang, Y. H., Hu, M., Zhong, L. J., Wiedensohler, A., Liu, S. C., Andreae, M. O., Wang, W., Fan, S.](#)  
1396 [J.: Regional integrated experiments on air quality over Pearl River Delta 2004 \(PRIDE-](#)  
1397 [PRD2004\): overview. Atmos. Environ. 42, 6157–6173, 2008.](#)

1398 [Zhang, X. Y., Wang, Y. Q., Niu, T., Zhang, X. C., Gong, S.L., Zhang, Y.M., Sun, T.Y., 2012.](#)  
1399 [Atmospheric aerosol compositions in China: spatial/temporal variability, chemical signature,](#)  
1400 [regional haze distribution and comparisons with global aerosols. Atmospheric Chemistry and](#)  
1401 [Physics 12, 779-799.](#)

1402 [Zhang, X.Y., Wang, Y.Q., Zhang, X.C., Guo, W., Gong, S.L., 2008. Carbonaceous aerosol](#)  
1403 [composition over various regions of China during 2006. Journal of Geophysical Research 113,](#)  
1404 [D14111.](#)

1405 [Zhang, Y. L., Cao, F. Fine particulate matter \(PM2.5\) in China at a city level. Sci. Rep. 2015, 5,](#)  
1406 [14884.](#)

1407 [Zhang, Y., Shao, K., Tang, X., 1998. The study of urban photochemical smog pollution in China.](#)  
1408 [Acta Scientiarum Naturalium-Universitatis Pekinensis 34, 392–400.](#)

1409 Zheng, J., Zhong, L., Wang, T., Louie, P.K.K., Li, Z., 2010. Ground-level ozone in the Pearl River  
1410 Delta region: analysis of data from a recently established regional air quality monitoring  
1411 network. Atmos. Environ. 44, 814–823.

1412 ~~[Zhang, Y.H., Hu, M., Zhong, L.J., Wiedensohler, A., Liu, S.C., Andreae, M.O., Wang, W., Fan,](#)~~  
1413 ~~[S.J.: Regional integrated experiments on air quality over Pearl River Delta 2004 \(PRIDE-](#)~~  
1414 ~~[PRD2004\): overview. Atmos. Environ. 42, 6157–6173, 2008.](#)~~

1415 Zhu, J.L., Wang, T.J., Talbot, R.H., Mao, H.T., Hall, C.B., Yang, X.Q., Fu, C.B., Zhuang, B.  
1416 L., Li, S., Han, Y., Huang, X., 2012. Characteristics of atmospheric Total Gaseous Mercury  
1417 (TGM) observed in urban Nanjing, China. Atmospheric Chemistry and Physics 12, 12103-

1418 12118.

1419 Zhuang, B.L., Liu, L., Shen, F.H., Wang, T.J., Han, Y., 2010. Semidirect radiative forcing of  
1420 internal mixed black carbon cloud droplet and its regional climatic effect over China. Journal  
1421 of Geophysical Research 115, D00K19.

1422 Zhuang, B.L., Liu, Q., Wang, T.J., Yin, C.Q., Li, S., Xie, M., Jiang, F., Mao, H.T., 2013.  
1423 Investigation on semi-direct and indirect climate effects of fossil fuel black carbon aerosol  
1424 over China. Theoretical and Applied Climatology 114, 651-672.

1425 Zhuang, B. L., Li, S., Wang, T. J., Deng, J. J., Xie, M., Yin, C. Q., and Zhu, J. L.: Direct radiative  
1426 forcing and climate effects of anthropogenic aerosols with different mixing states over China,  
1427 Atmos. Environ., 79, 349–361, doi:10.1016/j.atmosenv.2013.07.004, 2013b.

1428 [Zhuang, B. L., Li, S., Wang, T. J., Liu, J., Chen, H. M., Chen, P. L., Li, M. M., Xie, M.: Interaction](#)  
1429 [between the Black Carbon Aerosol Warming Effect and East Asian Monsoon Using RegCM4.](#)  
1430 [Journal of Climate, 2018, 31\(22\):9367-9388.](#)

1431 Zhuang, B. L., Wang, T. J., Liu, J., Li, S., Xie, M., Han, Y., Chen, P. L., Hu, Q. D., Yang X.Q., Fu,  
1432 C. B., and Zhu, J. L.: The surface aerosol optical properties in the urban area of Nanjing, west  
1433 GTH River Delta, China. Atmos. Chem. Phys., 17, 1143–1160, doi:10.5194/acp-17-1143-  
1434 2017, 2017.

1435 [Zhuang, B. L., Wang, T. J., Liu, J., Li, S., Xie, M., Yang, X. Q., Fu, C. B., Sun, J. N., Yin, C. Q.,](#)  
1436 [Liao, J. B., Zhu, J. L., and Zhang, Y.: Continuous measurement of black carbon aerosol in urban](#)  
1437 [Nanjing of Yangtze River Delta, China, Atmos. Environ., 89, 415–424, 2014b.](#)

1438 Zhuang, B. L., Wang, T. J., Liu, J., Ma, Y., Yin, C. Q., Li, S., Xie, M., Han, Y., Zhu, J. L., Yang,  
1439 X. Q., and Fu, C. B.: Absorption coefficient of urban aerosol in Nanjing, west Yangtze River  
1440 Delta, China, Atmos. Chem. Phys., 15, 13633–13646, doi:10.5194/acp-15-13633-2015, 2015.

1441 [Zhuang, B. L., Wang, T. J., Li, S., Liu, J., Talbot, R., Mao, H. T., Yang, X. Q., Fu, C. B., Yin, C. Q.,](#)



1442 [Zhu, J. L., Che, H. Z., and Zhang, X. Y.: Optical properties and radiative forcing of urban aerosols](#)  
1443 [in Nanjing, China, Atmos. Environ., 83, 43–52, 2014a.](#)

1444 **Figure Caption**

1445 Fig 1. Time series of the concentrations of PM<sub>10</sub>, PM<sub>2.5</sub>, and BC from September 2016 to February  
1446 2017 at Gulou site, Nanjing, China.

1447 Fig 2. Seasonal variations of (a) BC, (b) PM<sub>2.5</sub>, and (c) PM<sub>10</sub>. Red markers represent the monthly  
1448 averages at Gulou site, Nanjing, China.

1449 Fig 3. 6-month mean diurnal variations of BC, PM<sub>2.5</sub>, and PM<sub>10</sub> at Gulou site, Nanjing, China from  
1450 September 2016 to February 2017.

1451 Fig.4 Time series of particles from September 2016 to February 2017 at Gulou site.

1452 Fig 5. Seasonal variations of (a) O<sub>3</sub>, (b) NO<sub>x</sub>, (c) CO, and (d) NO<sub>y</sub>. The 10, 25, 50, 75, and 90%  
1453 percentile values of each are shown in black, and red markers represent the monthly averages.

1454 Fig 6. 6-month mean diurnal variations of (a) trace gases and (b) UV (ultra-violet radiation) at  
1455 Gulou site from September 2016 to February 2017.

1456 Fig 7. Scatter plots of (a) O<sub>3</sub>-NO<sub>x</sub> color-coded with air temperature (T) and (b) PM<sub>2.5</sub>-Vis color-  
1457 coded with relative humidity (RH).

1458 Fig 8. Scatter plots of (a) PM<sub>2.5</sub>-O<sub>3</sub> and (b) BC-O<sub>3</sub> color-coded with air temperature (T).

1459 Fig 9. Scatter plots of (a) O<sub>3</sub>-UV and (b) PM<sub>2.5</sub>-UV color coded with O<sub>3</sub>. Fig 10. Scatter plots of (a)

1460 CO-NO<sub>x</sub>, (b) PM<sub>2.5</sub>-NO<sub>x</sub>, and (c) BC-NO<sub>x</sub> color-coded with O<sub>3</sub>.

1461 Fig 11. Clusters of 96 h back trajectories arriving at the study site at 100 m in 2016 fall.

1462 Fig 12. The 10, 25, 50, 75, and 90% percentile values in each cluster of back trajectories in 2016

1463 fall of (a) BC, (b) PM<sub>2.5</sub>, (c) PM<sub>2.5</sub>/PM<sub>10</sub>, (d) CO, (e) O<sub>3</sub>, (f) NO<sub>y</sub>, (g)  $\alpha_{ts}$ , and (h)  $\omega_0$ . Black  
1464 markers represent the averages.

1465 Fig 13. Clusters of 96 h back trajectories arriving at the study site at 100m in 2016 winter.

1466 Fig 14. The 10, 25, 50, 75, and 90% percentile values in each cluster of back trajectories in 2016  
1467 winter of (a) BC, (b) PM<sub>2.5</sub>, (c) PM<sub>2.5</sub>/PM<sub>10</sub>, (d) CO, (e) O<sub>3</sub>, (f) NO<sub>y</sub>, (g)  $\alpha_{ts}$ , and (h)  $\omega_0$ . Black  
1468 markers represent the averages.

1469 Fig 15. Time series during December 3-6, 2016, for (a) PM<sub>2.5</sub>, BC and O<sub>3</sub> with associated  
1470 meteorological parameters, trace gases and (b) optical parameters. Red markers represent O<sub>3</sub> over  
1471 daily maximum average during winter. Weather charts on (c) 4th and (d) 5th December. (f) 96h  
1472 backward trajectories analysis ending at 1200 UTC on 5th December

1473  
1474  
1475  
1476  
1477

1478 **Table**

1479 Table 1 Measurements at Gulou site.

| Measurement               |                                        | Instrument                       | Resolution                        |
|---------------------------|----------------------------------------|----------------------------------|-----------------------------------|
| Meteorological parameters | T (°C)                                 | Thermo Instruments, THOM 1405-DF |                                   |
|                           | P (atm)                                | Thermo Instruments, THOM 1405-DF |                                   |
|                           | RH (%)                                 | Thermo Instruments, THOM 1405-DF |                                   |
|                           | Rainfall (mm)                          |                                  |                                   |
|                           | Vis (m)                                | Visibility Meter, GSN-1          |                                   |
|                           | UV (W/m <sup>2</sup> )                 |                                  |                                   |
| Particles                 | BC (ng/m <sup>3</sup> )                | Aethalometer, Model AE-31        | 1 ng/m <sup>3</sup>               |
|                           | PM <sub>2.5</sub> (µg/m <sup>3</sup> ) | Thermo Instruments, THOM 1405-DF | 0.1 µg/m <sup>3</sup>             |
|                           | PM <sub>10</sub> (µg/m <sup>3</sup> )  | Thermo Instruments, THOM 1405-DF | 0.1 µg/m <sup>3</sup>             |
| Gaseous pollutant         | CO (ppb)                               | Thermo Instruments, TEI 48i      | 1 ppb                             |
|                           | NO <sub>x</sub> (ppb)                  | Thermo Instruments, TEI 42i      | 0.4 ppb                           |
|                           | NO <sub>y</sub> (ppb)                  | Thermo Instruments, TEI 42iY     | 0.4 ppb                           |
|                           | O <sub>3</sub> (ppb)                   | Thermo Instruments, TEI 49i      | 0.01 ppb                          |
| Optical parameters        | SC (Mm <sup>-1</sup> )                 | Nephelometer, Aurora 3000        | 10 <sup>-3</sup> Mm <sup>-1</sup> |
|                           | BSP (Mm <sup>-1</sup> )                | Nephelometer, Aurora 3000        | 10 <sup>-3</sup> Mm <sup>-1</sup> |
|                           | AAC (Mm <sup>-1</sup> )                | Aethalometer, Model AE-31        | 10 <sup>-3</sup> Mm <sup>-1</sup> |

1480

1481

1482 Table 2 Statistics of general meteorological parameters at Gulou site for the 6-month period

1483 September 2016~ February 2017.

| Month | Temp<br>(°C) | Pres<br>(hPa) | RH<br>(%) | Rainfall<br>(mm) | Vis<br>(km) | UV<br>(W/m <sup>2</sup> ) |
|-------|--------------|---------------|-----------|------------------|-------------|---------------------------|
| Sep   | 24.88        | 996.97        | 69.41     | 2.34             | 11.84       | 10.36                     |
| Oct   | 18.37        | 1003.01       | 85.01     | 3.12             | 9.07        | 5.28                      |
| Nov   | 12.36        | 1007.87       | 77.15     | 1.19             | 8.99        | 5.67                      |
| Dec   | 8.74         | 1010.53       | 70.33     | 0.81             | 7.61        | 5.03                      |
| Jan   | 6.49         | 1010.89       | 70.65     | 0.59             | 9.23        | 4.94                      |
| Feb   | 7.72         | 1009.65       | 59.99     | 0.45             | 10.24       | 7.04                      |

1484

1485

1486

1487

1488 Table 3 Statistics of the three particles during the study period at Gulou site, Nanjing, China

|                                                | SON               | DJF               | Cold seasons      |         |         |
|------------------------------------------------|-------------------|-------------------|-------------------|---------|---------|
|                                                | Mean $\pm$ STD    | Mean $\pm$ STD    | Mean $\pm$ STD    | Maximum | Minimum |
| BC ( $\mu\text{g}/\text{m}^3$ )                | 2.126 $\pm$ 1.457 | 3.083 $\pm$ 1.827 | 2.602 $\pm$ 1.720 | 15.609  | 0.064   |
| PM <sub>2.5</sub> ( $\mu\text{g}/\text{m}^3$ ) | 43.1 $\pm$ 25.4   | 73.2 $\pm$ 40.0   | 58.2 $\pm$ 36.8   | 256.2   | 0.8     |
| PM <sub>10</sub> ( $\mu\text{g}/\text{m}^3$ )  | 67.6 $\pm$ 39.1   | 105.0 $\pm$ 54.0  | 86.3 $\pm$ 50.8   | 343.4   | 1.1     |

1489

1490

1491 Table 4 Statistics of trace gases during the study period

|                       | SON             | DJF             | Cold seasons    |         |         |
|-----------------------|-----------------|-----------------|-----------------|---------|---------|
|                       | Mean $\pm$ STD  | Mean $\pm$ STD  | Mean $\pm$ STD  | Maximum | Minimum |
| CO (ppb)              | 753 $\pm$ 353   | 950 $\pm$ 388   | 851 $\pm$ 384   | 2852    | 176     |
| NO <sub>x</sub> (ppb) | 21.4 $\pm$ 13.4 | 25.6 $\pm$ 15.5 | 23.5 $\pm$ 14.7 | 80.0    | 2.7     |
| NO <sub>y</sub> (ppb) | 28.6 $\pm$ 20.5 | 37.0 $\pm$ 23.1 | 32.8 $\pm$ 22.3 | 158.4   | 3.6     |
| O <sub>3</sub> (ppb)  | 42.3 $\pm$ 40.1 | 33.1 $\pm$ 24.4 | 37.7 $\pm$ 35.5 | 235.7   | 0.2     |

1492

1493

1494 Table 5 Statistics of maximum and number of exceedances of O<sub>3</sub> and PM<sub>2.5</sub> compared with the

1495 National Ambient Air Quality Standards in China.

| Aerosol           | Mean $\pm$ STD ( $\mu\text{g}/\text{m}^3$ ) | Max ( $\mu\text{g}/\text{m}^3$ ) | N.o.E. |
|-------------------|---------------------------------------------|----------------------------------|--------|
| PM <sub>2.5</sub> | 58.2 $\pm$ 36.8                             | 256.2                            | 48     |
| PM <sub>10</sub>  | 86.3 $\pm$ 50.8                             | 343.4                            | 14     |
| O <sub>3</sub>    | 80.8 $\pm$ 71.8                             | 235.7                            | 37     |

1496 N.o.E. of PM<sub>2.5</sub> accounts for days with 24 h average over 75  $\mu\text{g}/\text{m}^3$ . N.o.E. of PM<sub>10</sub> accounts for days1497 with 24 h average over 150  $\mu\text{g}/\text{m}^3$ . N.o.E. of O<sub>3</sub> accounts for days with maximum 8 h average exceed1498 160  $\mu\text{g}/\text{m}^3$ .

1499

1500

1501

1502

1503

1504

1505

1506

1507

1508

1509

Table 6 Statistics of aerosols at Gulou site with and without rainfall for the 6-month period

1510

September 2016~ February 2017

| Aerosols                                       | With Rainfall     |         |         | Without Rainfall  |         |         |
|------------------------------------------------|-------------------|---------|---------|-------------------|---------|---------|
|                                                | Mean ± STD        | Maximum | Minimum | Mean ± STD        | Maximum | Minimum |
| BC ( $\mu\text{g}/\text{m}^3$ )                | $1.676 \pm 1.261$ | 8.256   | 0.064   | $2.723 \pm 1.735$ | 15.608  | 0.211   |
| PM <sub>2.5</sub> ( $\mu\text{g}/\text{m}^3$ ) | $31.2 \pm 27.6$   | 218.4   | 1.2     | $61.9 \pm 36.3$   | 256.2   | 0.8     |
| PM <sub>10</sub> ( $\mu\text{g}/\text{m}^3$ )  | $54.3 \pm 44.8$   | 307.3   | 3.9     | $89.1 \pm 47.3$   | 319.6   | 4.5     |
| CO (ppb)                                       | $659 \pm 240$     | 2194    | 176     | $876 \pm 392$     | 2852    | 228     |
| NO <sub>x</sub> (ppb)                          | $20.4 \pm 12.7$   | 75.5    | 2.9     | $23.9 \pm 14.9$   | 80      | 2.7     |
| NO <sub>y</sub> (ppb)                          | $25.2 \pm 16.8$   | 110.3   | 3.6     | $33.8 \pm 22.8$   | 158.4   | 5.2     |
| O <sub>3</sub> (ppb)                           | $22.3 \pm 17.1$   | 81.7    | 0.3     | $39.7 \pm 34.6$   | 235.7   | 0.2     |

1511

1512 **Figures**

1513

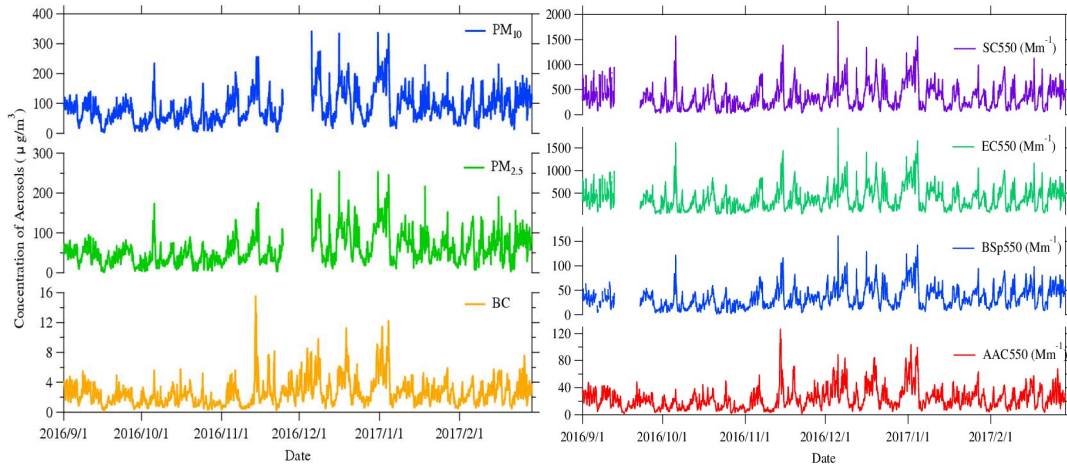

1514

1515

Fig 1. Time series of (a) concentrations and (b) optical properties of PM<sub>10</sub>, PM<sub>2.5</sub>, and BC from September 2016 to February 2017 at Gulou site, Nanjing, China.

1516

1517

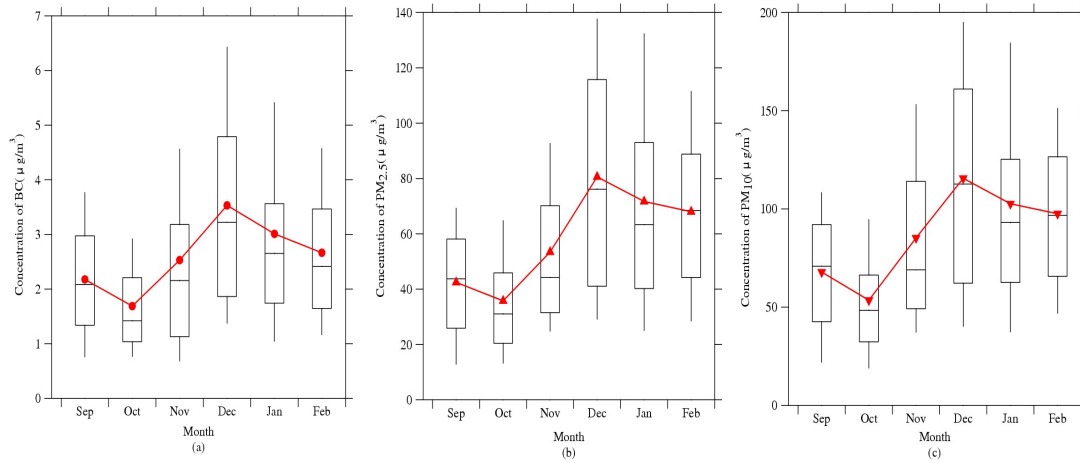

1518

1519 Fig 2. Seasonal variations of (a) BC, (b) PM<sub>2.5</sub>, and (c) PM<sub>10</sub>. Red markers represent the monthly

1520

averages at Gulou site, Nanjing, China.

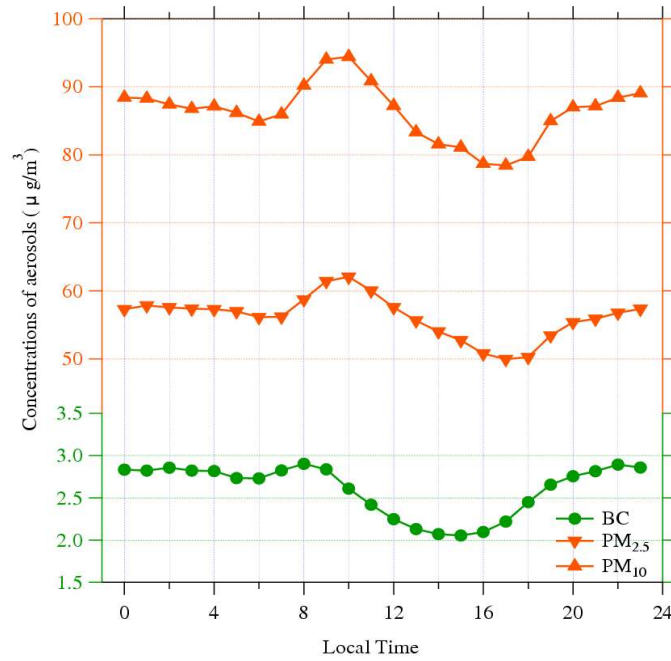

1521

1522 Fig 3. 6-month mean diurnal variations of BC, PM<sub>2.5</sub>, and PM<sub>10</sub> at Gulou site, Nanjing, China

1523

from September 2016 to February 2017

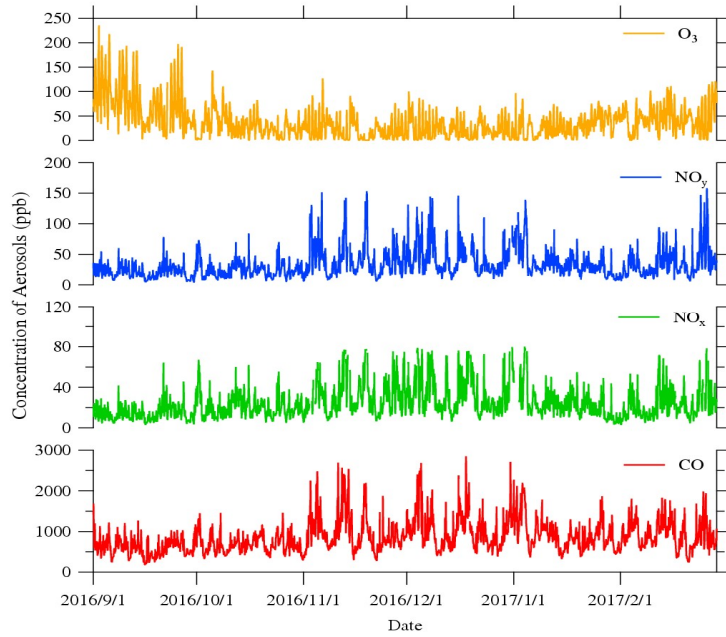

1524

1525

Fig.4 Time series of particles from September 2016 to February 2017 at Gulou site.

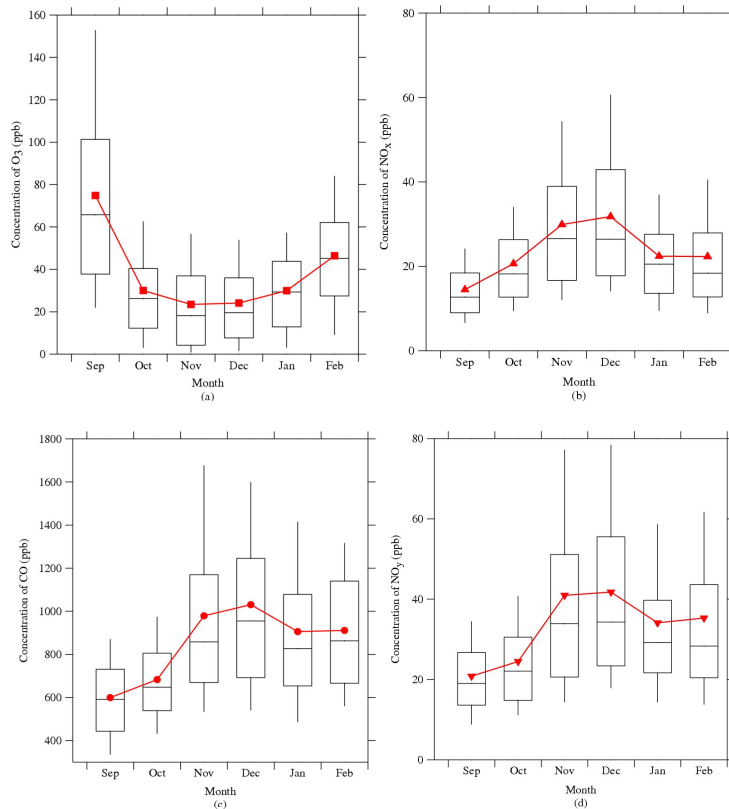

1526

1527

1528

Fig 5. Seasonal variations of (a) O<sub>3</sub>, (b) NO<sub>x</sub>, (c) CO, and (d) NO<sub>y</sub>. The 10, 25, 50, 75, and

1529

90% percentile values of each are shown in black, and red markers represent the monthly

1530

averages.

1531

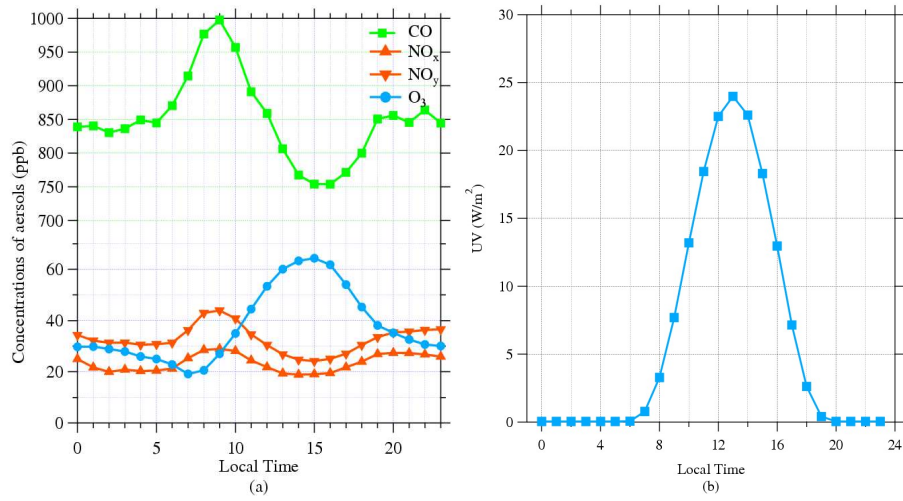

1532

1533 Fig 6. 6-month mean diurnal variations of (a) trace gases and (b) UV (ultra-violet radiation) at

1534

Gulou site from September 2016 to February 2017.

1535

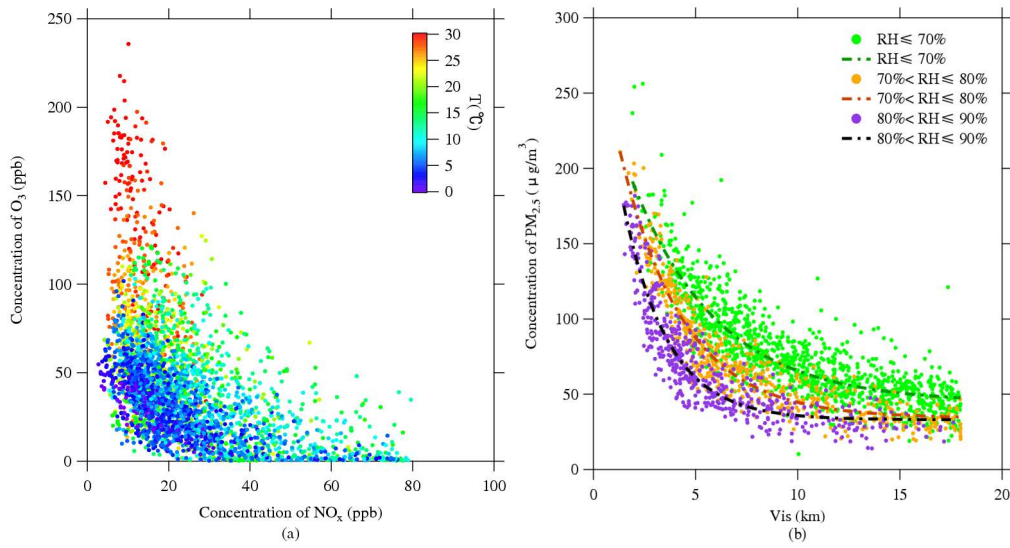

1536

1537 Fig 7. Scatter plots of (a) O<sub>3</sub>-NO<sub>x</sub> color-coded with air temperature (T) and (b) PM<sub>2.5</sub>-Vis color-

1538

coded with relative humidity (RH).



1539

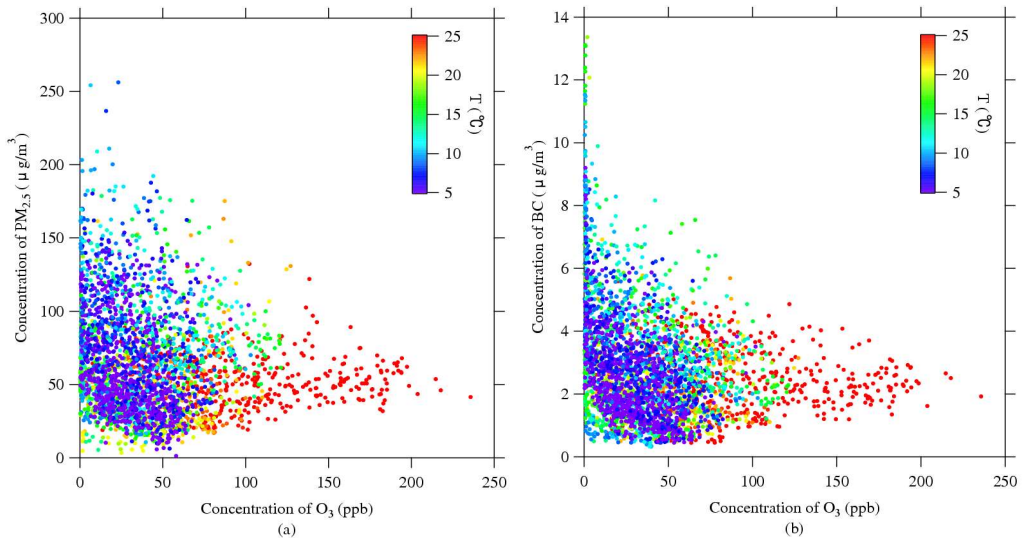

1540

1541 Fig 8. Scatter plots of (a) PM<sub>2.5</sub>-O<sub>3</sub> and (b) BC-O<sub>3</sub> color-coded with air temperature (T).

1542

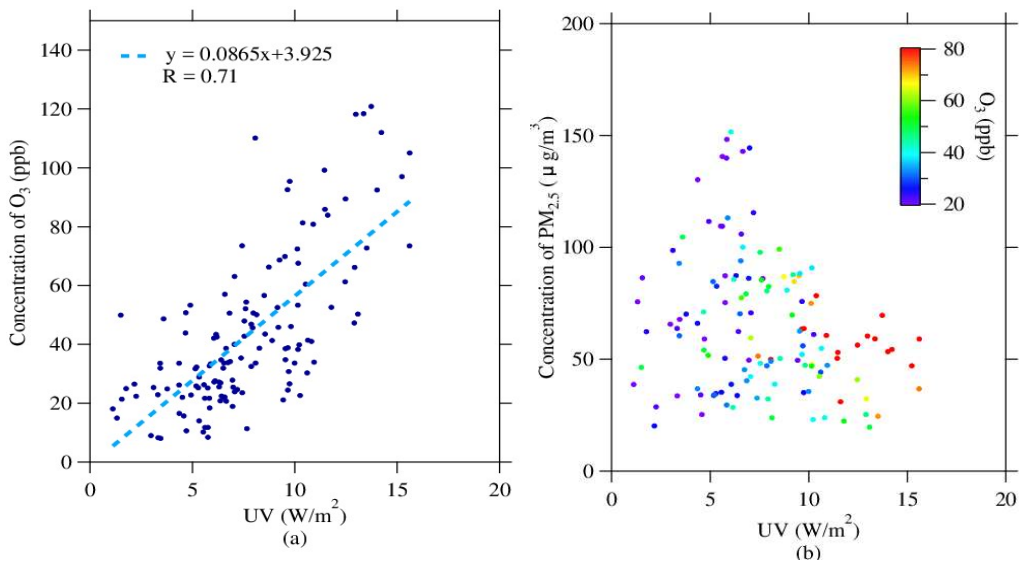

1543

1544

Fig 9. Scatter plots of (a) O<sub>3</sub>-UV and (b) PM<sub>2.5</sub>-UV color coded with O<sub>3</sub>.

1545

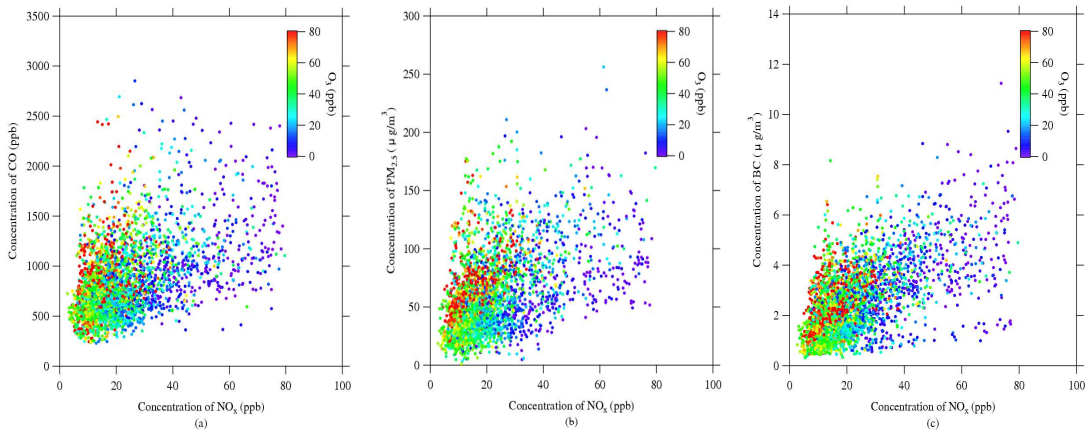

1546

1547

Fig 10. Scatter plots of (a) CO- $NO_x$ , (b)  $PM_{2.5}$ - $NO_x$ , and (c) BC- $NO_x$  color-coded with  $O_3$ .

1548

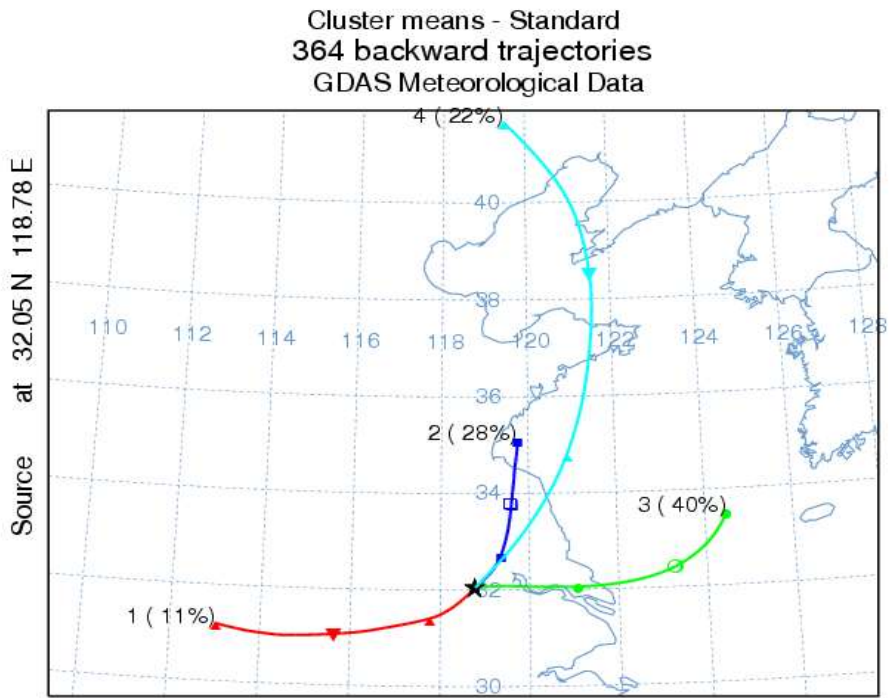

1549

1550

Fig 11. Clusters of 96 h back trajectories arriving at the study site at 100 m in 2016 fall.

1551

1552

1553

1554

1555

1556

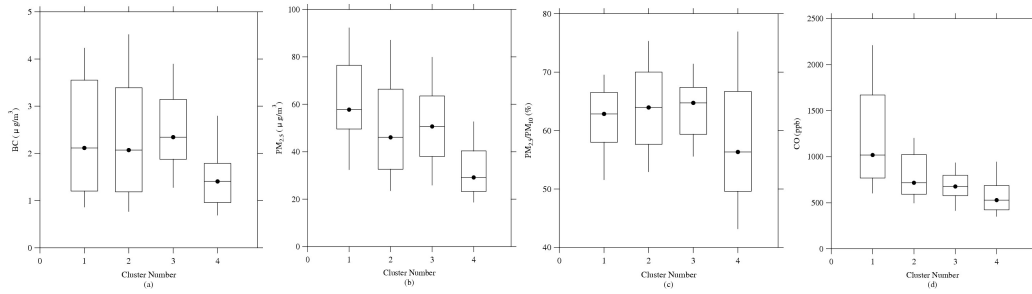

1557

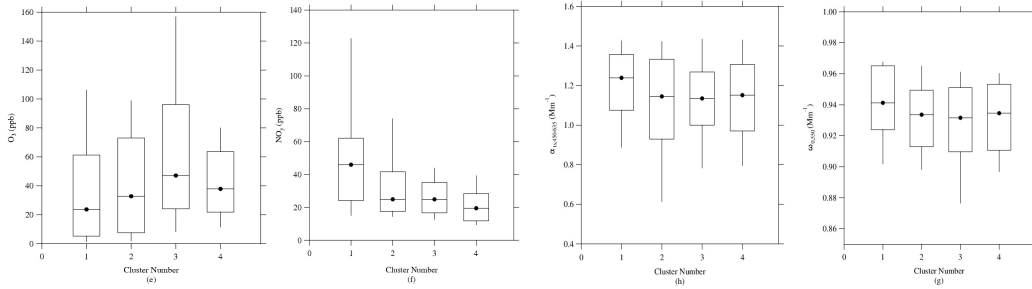

1558 Fig 12. The 10, 25, 50, 75, and 90% percentile values in each cluster of back trajectories in 2016

1559 fall of (a) BC, (b)  $\text{PM}_{2.5}$ , (c)  $\text{PM}_{2.5}/\text{PM}_{10}$ , (d) CO, (e)  $\text{O}_3$ , (f)  $\text{NO}_y$ , (g)  $\alpha_{ts}$ , and (h)  $\omega_0$ . Black

1560

markers represent the averages.

1561

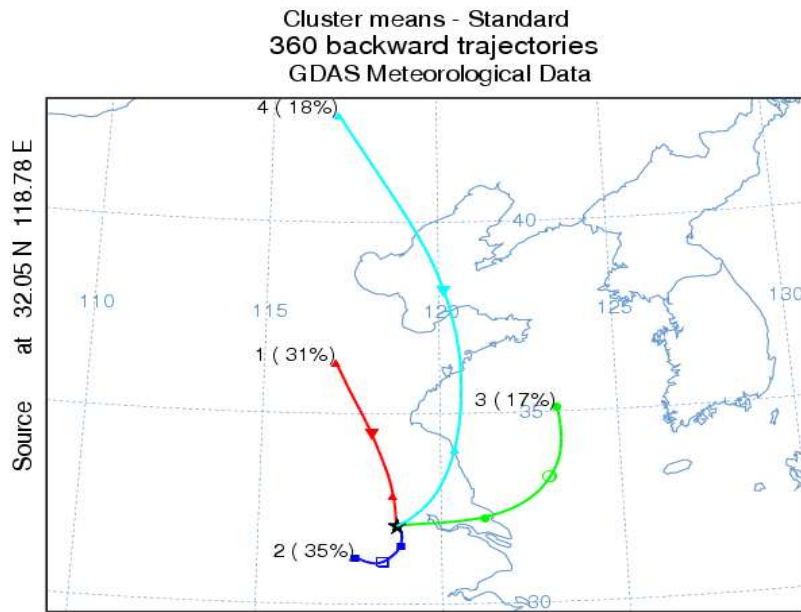

1562

1563 Fig 13. Clusters of 96 h back trajectories arriving at the study site at 100m in 2016 winter.

1564

1565

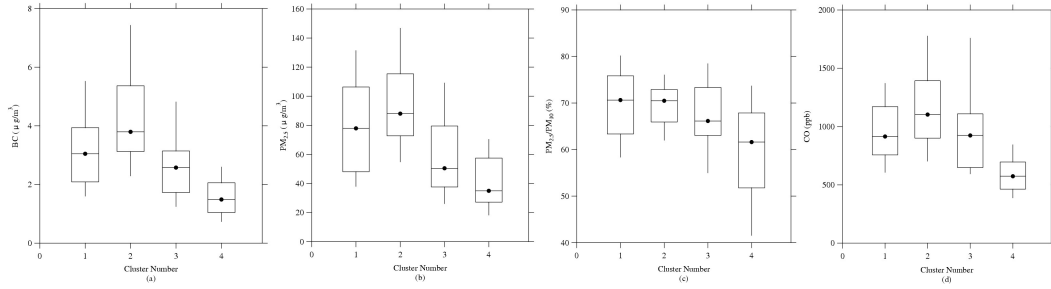

1566

1567

1568

Fig 14. The 10, 25, 50, 75, and 90% percentile values in each cluster of back trajectories in 2016

1569

winter of (a) BC, (b)  $\text{PM}_{2.5}$ , (c)  $\text{PM}_{2.5}/\text{PM}_{10}$ , (d) CO, (e)  $\text{O}_3$ , (f)  $\text{NO}_y$ , (g)  $\alpha_{ts}$ , and (h)  $\omega_0$ . Black

1570

markers represent the averages.

1571

1572

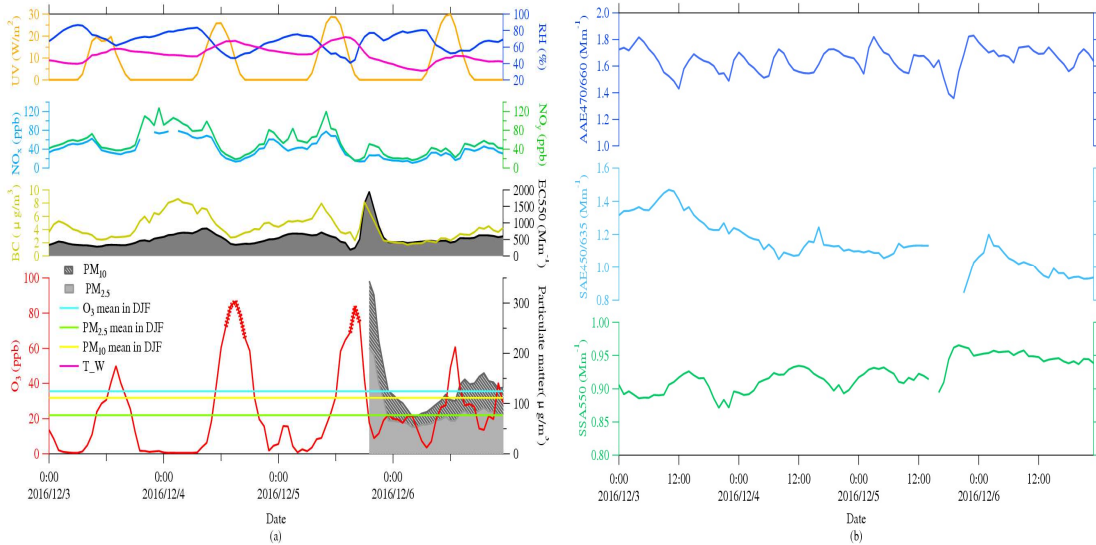

1573

1574  
1575

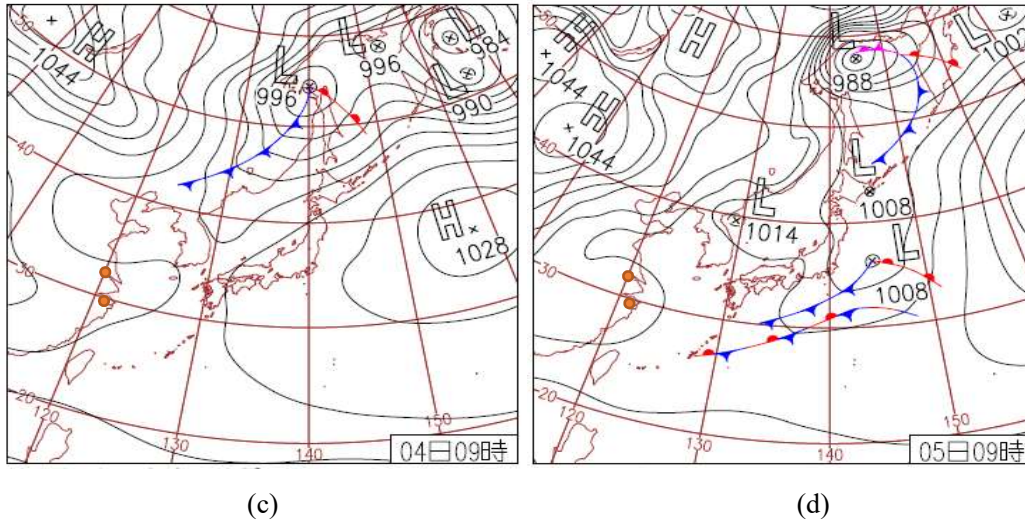

NOAA HYSPLIT MODEL  
Backward trajectories ending at 1200 UTC 05 Dec 16  
GDAS Meteorological Data

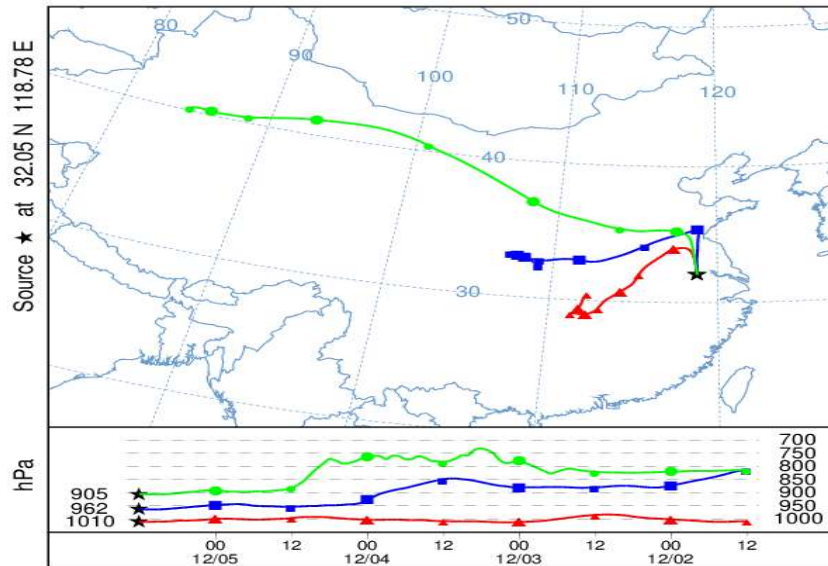

1576  
1577

(f)

1578 Fig 15. Time series during December 3-6, 2016, for (a) PM<sub>2.5</sub>, BC and O<sub>3</sub> with associated  
1579 meteorological parameters, trace gases and (b) optical parameters. Red markers represent O<sub>3</sub> over  
1580 daily maximum average during winter. Weather charts on (c) 4th and (d) 5th December. (f) 96h  
1581 backward trajectories analysis ending at 1200 UTC on 5th December.
